# Supplementary material for: pilE G-Quadruplex Is Recognized and Preferentially Bound but Not Processed by the MutL Endonuclease from Neisseria gonorrhoeae Mismatch Repair Pathway
Source: Int J Mol Sci. 2023 Mar 24;24(7):6167. doi: 10.3390/ijms24076167 (PMC10094033; doi:10.3390/ijms24076167)
Supplement: Supplementary file 1 [file ijms-24-06167-s001.zip]

Archive with 6 entries (6 files):
- Supplementary Materials_final.pdf
- Table S1.xlsx
- Table S2.xlsx
- Table S3.xlsx
- Table S4.xlsx
- Table S5.xlsx
