# Supplementary material for: pilE G-Quadruplex Is Recognized and Preferentially Bound but Not Processed by the MutL Endonuclease from Neisseria gonorrhoeae Mismatch Repair Pathway
Source: Int J Mol Sci. 2023 Mar 24;24(7):6167. doi: 10.3390/ijms24076167 (PMC10094033; doi:10.3390/ijms24076167)
Supplement: Supplementary file 1 [file ijms-24-06167-s001.zip › Table S1.xlsx]

## Sheet: Breakdown
Breakdown of NEIS2138 by species:
Selected options: Display values only.
NEIS2138	species
	Neisseria gonorrhoeae	Neisseria animalis	Neisseria animaloris	Neisseria bacilliformis	Neisseria basseii	Neisseria benedictiae	Neisseria bergeri	Neisseria blantyrii	Neisseria canis	Neisseria cinerea	Neisseria dentiae	Neisseria elongata	Neisseria elongata subsp. elongata	Neisseria elongata subsp. glycolytica	Neisseria elongata subsp. nitroreducens	Neisseria flavescens	Neisseria iguanae	Neisseria lactamica	Neisseria macacae	Neisseria maigaei	Neisseria meningitidis	Neisseria mucosa	Neisseria musculi	Neisseria oralis	Neisseria perflava	Neisseria polysaccharea	Neisseria shayeganii	Neisseria sicca	Neisseria sp.	Neisseria subflava	Neisseria uirgultaei	Neisseria viridiae	Neisseria wadsworthii	Neisseria weaveri	Neisseria zoodegmatis	Non-Neisseria sp.	Total
Total	18521	1	1	4	2	4	62	14	3	57	2	2	1	1	1	3	1	1368	1	1	66685	39	8	12	4	85	1	2	447	95	9	21	1	2	2	3	87466
41	6165																												1								6166
No value	2889		1	4			1			43	2	1		1		3	1	762	1		39783	39		10	4	19	1	2	445	72			1	2	2	3	44092
45	2398																				1																2399
351	1158																																				1158
43	1080																																				1080
48	875																																				875
348	565																				1																566
667	323																																				323
851	284																																				284
632	281																																				281
643	279																																				279
641	227																																				227
634	202																																				202
648	197																																				197
349	180																																				180
1519	109																																				109
640	60																																				60
638	58																																				58
636	56																																				56
271	47																																				47
2400	42																																				42
664	32																																				32
1902	25																																				25
3266	25																																				25
1545	23																																				23
875	20																																				20
1541	19																																				19
1562	19																																				19
1570	19																																				19
668	18																																				18
1549	18																																				18
44	16																																				16
672	16																																				16
1389	16																																				16
1517	16																																				16
1552	16																																				16
1564	15																																				15
3840	15																																				15
753	14																																				14
2386	14																																				14
2518	14																																				14
347	12																																				12
650	12																																				12
893	12																																				12
1569	12																																				12
646	11																																				11
892	11																																				11
1514	11																																				11
1546	11																																				11
1513	10																																				10
1896	10																																				10
3247	9																																				9
1516	8																																				8
354	7																																				7
1390	7																																				7
1544	7																																				7
1559	7																																				7
1685	7																																				7
1898	7																																				7
2399	7																																				7
2432	7																																				7
639	6																																				6
654	6																																				6
1515	6																																				6
2427	6																																				6
3239	6																																				6
3257	6																																				6
352	5																																				5
674	5																																				5
887	5																																				5
1393	5																																				5
1561	5																																				5
1573	5																																				5
2429	5																																				5
3271	5																																				5
46	4																																				4
631	4																																				4
635	4																																				4
657	4																																				4
670	4																																				4
675	4																																				4
1565	4																																				4
1571	4																																				4
2240	4																																				4
2413	4																																				4
2420	4																																				4
2433	4																																				4
3242	4																																				4
3270	4																																				4
3335	4																																				4
3631	4																																				4
3888	4																																				4
353	3																																				3
658	3																																				3
663	3																																				3
853	3																																				3
854	3																																				3
876	3																																				3
879	3																																				3
881	3																																				3
885	3																																				3
1540	3																																				3
1556	3																																				3
1574	3																																				3
1860	3																																				3
2419	3																																				3
2422	3																																				3
2435	3																																				3
3251	3																																				3
3265	3																																				3
3348	3																																				3
3908	3																																				3
3981	3																																				3
4037	3																																				3
4152	3																																				3
4154	3																																				3
47	2																																				2
633	2																																				2
637	2																																				2
644	2																																				2
645	2																																				2
647	2																																				2
652	2																																				2
659	2																																				2
671	2																																				2
882	2																																				2
894	2																																				2
1056	2																																				2
1198	2																																				2
1542	2																																				2
1543	2																																				2
1551	2																																				2
1555	2																																				2
1557	2																																				2
1566	2																																				2
1579	2																																				2
1581	2																																				2
1722	2																																				2
1761	2																																				2
1762	2																																				2
1899	2																																				2
1971	2																																				2
2382	2																																				2
2383	2																																				2
2397	2																																				2
2404	2																																				2
2415	2																																				2
2434	2																																				2
3175	2																																				2
3249	2																																				2
3250	2																																				2
3333	2																																				2
3336	2																																				2
3345	2																																				2
3346	2																																				2
3403	2																																				2
3846	2																																				2
3855	2																																				2
3889	2																																				2
3907	2																																				2
4127	2																																				2
4128	2																																				2
4130	2																																				2
4151	2																																				2
42	1																																				1
346	1																																				1
350	1																																				1
630	1																																				1
642	1																																				1
649	1																																				1
651	1																																				1
653	1																																				1
655	1																																				1
656	1																																				1
660	1																																				1
661	1																																				1
662	1																																				1
665	1																																				1
666	1																																				1
669	1																																				1
673	1																																				1
676	1																																				1
750	1																																				1
751	1																																				1
752	1																																				1
873	1																																				1
874	1																																				1
877	1																																				1
878	1																																				1
880	1																																				1
883	1																																				1
884	1																																				1
886	1																																				1
888	1																																				1
889	1																																				1
890	1																																				1
891	1																																				1
1110	1																																				1
1111	1																																				1
1112	1																																				1
1113	1																																				1
1195	1																																				1
1196	1																																				1
1197	1																																				1
1199	1																																				1
1388	1																																				1
1547	1																																				1
1548	1																																				1
1550	1																																				1
1553	1																																				1
1554	1																																				1
1558	1																																				1
1560	1																																				1
1567	1																																				1
1568	1																																				1
1572	1																																				1
1575	1																																				1
1576	1																																				1
1577	1																																				1
1578	1																																				1
1580	1																																				1
1760	1																																				1
1763	1																																				1
1764	1																																				1
1800	1																																				1
1801	1																																				1
1897	1																																				1
1900	1																																				1
1988	1																																				1
2036	1																																				1
2161	1																																				1
2162	1																																				1
2163	1																																				1
2384	1																																				1
2385	1																																				1
2387	1																																				1
2388	1																																				1
2389	1																																				1
2390	1																																				1
2391	1																																				1
2392	1																																				1
2393	1																																				1
2398	1																																				1
2401	1																																				1
2402	1																																				1
2403	1																																				1
2405	1																																				1
2406	1																																				1
2407	1																																				1
2416	1																																				1
2417	1																																				1
2418	1																																				1
2421	1																																				1
2423	1																																				1
2424	1																																				1
2425	1																																				1
2426	1																																				1
2428	1																																				1
2430	1																																				1
2431	1																																				1
2436	1																																				1
2516	1																																				1
2517	1																																				1
2808	1																																				1
3176	1																																				1
3177	1																																				1
3240	1																																				1
3241	1																																				1
3243	1																																				1
3244	1																																				1
3245	1																																				1
3246	1																																				1
3248	1																																				1
3252	1																																				1
3253	1																																				1
3254	1																																				1
3255	1																																				1
3256	1																																				1
3258	1																																				1
3259	1																																				1
3260	1																																				1
3261	1																																				1
3262	1																																				1
3263	1																																				1
3264	1																																				1
3267	1																																				1
3268	1																																				1
3272	1																																				1
3306	1																																				1
3308	1																																				1
3309	1																																				1
3330	1																																				1
3332	1																																				1
3334	1																																				1
3337	1																																				1
3338	1																																				1
3347	1																																				1
3359	1																																				1
3373	1																																				1
3382	1																																				1
3384	1																																				1
3385	1																																				1
3395	1																																				1
3541	1																																				1
3632	1																																				1
3718	1																																				1
3719	1																																				1
3841	1																																				1
3844	1																																				1
3845	1																																				1
3847	1																																				1
3849	1																																				1
3850	1																																				1
3851	1																																				1
3853	1																																				1
3882	1																																				1
3884	1																																				1
3887	1																																				1
3894	1																																				1
3896	1																																				1
3903	1																																				1
3904	1																																				1
3906	1																																				1
3909	1																																				1
3914	1																																				1
3919	1																																				1
4036	1																																				1
4040	1																																				1
4041	1																																				1
4042	1																																				1
4043	1																																				1
4044	1																																				1
4116	1																																				1
4126	1																																				1
4129	1																																				1
4131	1																																				1
4133	1																																				1
4153	1																																				1
4155	1																																				1
4156	1																																				1
4157	1																																				1
4158	1																																				1
4159	1																																				1
1																					5266																5266
2																		228																			228
3																		2																			2
4																					313																313
5																					1428																1428
6																					367																367
7																					2																2
8																					1																1
9																					77																77
10																					1																1
11																					4																4
12																					3																3
13																					1																1
14																					987																987
15																					102																102
16																					88																88
17																					665																665
18																					12																12
19																					22																22
20																					942																942
21																					32																32
22																		2																			2
23																					18																18
24																					3																3
25																					32																32
26																					1																1
27																					284																284
28																					2																2
29																					2																2
30																					541																541
31																					1845																1845
32																					2																2
33																					1																1
34																					568																568
35																					14																14
36																					250																250
37																					1																1
38																					295																295
39																					6																6
40																					333																333
49																					88																88
50																					1																1
51																					137																137
53																					1																1
54																					1																1
55																					12																12
56																					8																8
57																					1																1
58																					1																1
59																					52																52
60																					1																1
61																					57																57
63																					2																2
64																					2																2
65																					12																12
66																					469																469
67																					1																1
68																					1																1
69																					15																15
70																					5																5
71																		3																			3
72																		2																			2
73										1																											1
74																					558																558
75																					11																11
76																					4																4
77																					616																616
78																					4																4
79																					2																2
80																										3											3
81							17																														17
82																								1													1
83																					1																1
84																					2																2
85																					1																1
86																					1																1
87																					7																7
88																					14																14
89																					314																314
90																					80																80
91																					3																3
92																					573																573
93																					2																2
94																					1																1
95																					6																6
96																					18																18
97																					1																1
98																					1																1
99																					68																68
100																					2494																2494
101																					1																1
102																					19																19
103																					1																1
104																					26																26
105																					3																3
106																					4																4
107																					7																7
108																					76																76
109																					2																2
110																					2																2
111																					2																2
112																					2																2
113																					2																2
114																					88																88
115																					2																2
117																		1																			1
118																														2							2
119																					186																186
120																					35																35
121																					1																1
122																					1																1
123																					1																1
124																					1																1
125																					8																8
126																					4																4
127								1																													1
128																					92																92
129																					1																1
130																					2																2
131																					72																72
132																					6																6
133							2																														2
134						2																															2
135																										15											15
136								9																													9
137																																19					19
138										1																											1
139																														1							1
140															1																						1
141													1																								1
142		1																																			1
143																		35																			35
144																								1													1
145							3																														3
146																										7			1								8
147										2																											2
148																					1					4											5
149																														2							2
151																										1											1
152									2																												2
153										2																											2
154																														4							4
156																										2											2
158																					6																6
159																					1																1
160																					9																9
161																					6																6
162																					12																12
163																					3																3
164																					1																1
165																					1																1
166																					13																13
167																					1																1
168																					7																7
169																					48																48
170																					1																1
171																					1																1
172																					1																1
173																					1																1
174																					4																4
175																					2																2
176																					3																3
177																					29																29
178																					1																1
179																					2																2
180																					1																1
181																					2																2
182																					2																2
183																					1																1
184																					1																1
185																					7																7
186																					42																42
187																					1																1
188																		1																			1
189																					10																10
190																		2																			2
191																		10																			10
192																		15																			15
193																		15			1																16
194																		17																			17
195																		11																			11
196																		8																			8
197																		4																			4
198																					3																3
199																					13																13
200																					2																2
201																					1																1
202																					12																12
203																					1																1
204																					5																5
205																					1																1
206																					60																60
207																					1																1
208																					7																7
209																					2																2
210																					1																1
211																					38																38
212																					9																9
213																					9																9
214																					1																1
215																					3																3
216																					8																8
217																					1																1
218																					5																5
219																					2																2
220																					1																1
221																					1																1
222																					7																7
223																					1																1
224																					1																1
225																					1																1
226																					14																14
227																					1																1
228																					1																1
229																					89																89
230																					1																1
231																					2																2
232																					2																2
233																					2																2
234																					1																1
235																					7																7
236																					7																7
237																					1																1
238																					2																2
239																					3																3
240																					7																7
241																					1																1
242																					8																8
243																					16																16
244																					1																1
245																					14																14
246																					7																7
247																					2																2
248																					2																2
249																					1																1
250																					1																1
251																					6																6
252																					2																2
253																					3																3
254																					1																1
255																					4																4
256																					1																1
257																					57																57
258																					8																8
259																					5																5
260																					1																1
261																					2																2
262																					1																1
263																					1																1
264																					1																1
265																					1																1
266																					1																1
267																					8																8
268																					1																1
269																					1																1
270																					1																1
272																					5																5
273																					1																1
274																					1																1
275																					2																2
276																					2																2
277																					3																3
278																					1																1
279																					9																9
280																					1																1
281																					9																9
282																					1																1
283																					3																3
284																					5																5
285																					1																1
286																					1																1
287																					2																2
288																					3																3
289																					1																1
290																					1																1
291																					1																1
292																					1																1
293																					1																1
294																					1																1
295																					1																1
296																					4																4
297																					1																1
298																					1																1
299																					1																1
300																					1																1
301																					1																1
302																					7																7
303																					1																1
304																					15																15
305																					2																2
306																					2																2
307																					1																1
308																					2																2
309																					13																13
310																					4																4
311																					6																6
312																					4																4
313																					6																6
314																					2																2
315																					1																1
316																					14																14
317																					1																1
318																					4																4
319																					1																1
320																					1																1
321																					12																12
322																					13																13
323																					1																1
324																					1																1
325																					1																1
326																					2																2
327																					2																2
328																					1																1
329																					12																12
330																					1																1
331																					1																1
332																					1																1
333																					16																16
334																					1																1
335																					1																1
336																					1																1
337																					1																1
338																					1																1
339																					2																2
340																					1																1
341																					3																3
342																					4																4
343																					1																1
344																					2																2
345																		35																			35
356																					2																2
357																					1																1
358																					1																1
359																					2																2
360																					1																1
361																					3																3
362																					1																1
363																					20																20
364																					12																12
365																					16																16
366																					4																4
367																					1																1
368																					1																1
369																					1																1
370																					10																10
371																					2																2
372																					1																1
373																					1																1
374																					1																1
375																					11																11
376																					1																1
377																					1																1
378																					1																1
379																					1																1
380																					3																3
381																					97																97
382																					4																4
383																					1																1
384																					11																11
385																					1																1
386																					2																2
387																					3																3
388																					1																1
389																					244																244
390																					1																1
391																					1																1
392																					1																1
393																					4																4
394																					5																5
395																					1																1
396																					1																1
397																					1																1
398																					1																1
399																					12																12
400																					2																2
401																					1																1
402																					1																1
403																					1																1
404																					4																4
405																					1																1
406																					1																1
407																					1																1
408																					1																1
409																					1																1
410																					1																1
411																					21																21
412																					1																1
413																					1																1
414																					1																1
415																					3																3
416																					1																1
417																					1																1
418																					2																2
419																					3																3
420																					8																8
421																					1																1
422																					3																3
423																					2																2
424																					1																1
425																					4																4
426																					3																3
427																					2																2
428																					1																1
429																					3																3
430																					7																7
431																					2																2
432																					1																1
433																					2																2
434																					1																1
435																					1																1
436																					6																6
437																					1																1
438																					1																1
439																					14																14
440																					1																1
441																					1																1
442																					1																1
443																					1																1
444																					1																1
445																					2																2
446																					10																10
447																					11																11
448																					7																7
449																					17																17
450																					25																25
451																					2																2
452																					18																18
453																					8																8
454																					6																6
455																					1																1
456																					1																1
457																					1																1
458																		14																			14
459																		1																			1
460																		1																			1
461																					1																1
462																					5																5
463																					1																1
464																					1																1
465																					1																1
466																					1																1
467																					1																1
468																					1																1
469																					2																2
470																					1																1
471																					5																5
472																					4																4
473																					1																1
474																					21																21
475																					1																1
476																					1																1
477																					2																2
478																					2																2
479																					12																12
480																					1																1
481																					1																1
482																					1																1
483																					1																1
484																					1																1
485																					8																8
486																					3																3
487																					1																1
488																					1																1
489																					1																1
490																					2																2
491																					1																1
492																					1																1
493																					50																50
494																					1																1
495																					1																1
496																					1																1
497																					1																1
498																					1																1
499																					3																3
500																					5																5
501																					2																2
502																					1																1
503																					2																2
504																					4																4
505																					1																1
506																					2																2
507																					1																1
508																					1																1
509																					1																1
510																					2																2
511																					4																4
512																					1																1
513																							8														8
517																					1																1
521																					1																1
523																					2																2
525																					12																12
526																					1																1
527																					1																1
528																					2																2
529																					2																2
530																					1																1
531																					6																6
532																					3																3
533																					3																3
534																					1																1
535																					5																5
536																					6																6
537																					1																1
538																					1																1
539																					18																18
540																					1																1
541																					2																2
542																					1																1
543																					3																3
544																					1																1
545																					1																1
546																					1																1
547																					1																1
548																					2																2
549																					1																1
550																					1																1
551																					9																9
552																					2																2
553																					2																2
554																					1																1
555																					2																2
556																					2																2
557																					1																1
558																					1																1
559																					9																9
560																					2																2
561																					6																6
562																		19																			19
563																					1																1
564																					1																1
565																					1																1
566																					2																2
567																					1																1
568																					6																6
569																					1																1
570																					1																1
571																					13																13
572																					1																1
573																					1																1
574																					11																11
575																					2																2
576																					3																3
577																					1																1
578																					1																1
579																					1																1
580																					1																1
581																					1																1
582																					1																1
583																					1																1
584																					2																2
585																					2																2
586																					1																1
587																					2																2
588																					4																4
589																					1																1
592																					3																3
594																					1																1
595																					1																1
596																					4																4
597																					1																1
598																					1																1
599																					1																1
600																					3																3
601																					1																1
602																					5																5
603																					6																6
604																					1																1
605																					1																1
606																					1																1
607																					1																1
608																					1																1
609																					1																1
610																					2																2
611																					1																1
612																					2																2
613																					1																1
614																					10																10
615																					1																1
616																					1																1
617																					3																3
618																					1																1
619																					1																1
620																					37																37
621																					1																1
622																					2																2
623																					1																1
624																					3																3
625																					1																1
626																					3																3
627																					1																1
628																					2																2
629																					1																1
677																					16																16
678																					1																1
679																					1																1
680																					2																2
681																					1																1
682																					6																6
683																					3																3
684																					1																1
685																					2																2
686																					1																1
687																					1																1
688																					1																1
689																					1																1
690																					1																1
691																					1																1
692																					1																1
693																					4																4
694																					11																11
695																					1																1
696																					1																1
697																					1																1
698																					1																1
699																					1																1
700																					1																1
701																					1																1
702																					2																2
703																					1																1
704																					2																2
705																					1																1
706																					1																1
707																					1																1
708																					2																2
709																					1																1
710																					1																1
711																					2																2
712																					1																1
713																					2																2
714																					2																2
715																					2																2
716																					1																1
717																					2																2
718																					1																1
719																					1																1
720																					1																1
721																					1																1
722																					1																1
723																					3																3
724																					2																2
725																					1																1
726																					2																2
727																					1																1
728																					1																1
729																					5																5
730																					1																1
731																					1																1
732																					7																7
733																					1																1
734																					1																1
735																					1																1
736																					1																1
737																					5																5
738																					3																3
739																					1																1
740																					21																21
741																					3																3
742																					18																18
743																					2																2
744																					1																1
745																					5																5
746																					6																6
747																					8																8
748																					2																2
749																					1																1
754																					1																1
755																					1																1
756																					1																1
757																					9																9
758																					396																396
765																					2																2
767																					2																2
768																					5																5
769																					14																14
773																					21																21
775																					8																8
777																					1																1
778																					1																1
779																					1																1
780																					1																1
781																					1																1
782																					2																2
783																					3																3
784																					3																3
785																					2																2
786																					1																1
787																					1																1
788																					1																1
789																					2																2
790																					1																1
791																					232																232
792																					5																5
793																					2																2
794																					1																1
795																					1																1
796																					3																3
797																					1																1
798																					5																5
799																					1																1
800																					2																2
801																					1																1
802																					1																1
803																					1																1
804																					1																1
805																					1																1
806																					1																1
807																					1																1
808																					1																1
809																					1																1
810																					1																1
811																					1																1
812																					1																1
813																					1																1
814																					1																1
815																					3																3
816																					2																2
817																					1																1
818																					3																3
819																					1																1
820																					2																2
821																					1																1
822																					7																7
823																					1																1
824																					2																2
825																					1																1
826																					1																1
827																					1																1
828																					2																2
829																					1																1
830																					2																2
831																					4																4
832																					1																1
836																					2																2
843																					1																1
844																					1																1
845																										1											1
846																										2											2
847																					1																1
848																										1											1
849																					1																1
850																		1																			1
857																					4																4
858																					5																5
862																					1																1
863																					2																2
864																					3																3
865																					2																2
866																		3																			3
867																		4																			4
868																					1																1
869																					1																1
870																					1																1
871																					1																1
872																										1											1
895																					1																1
896																					1																1
897																					1																1
898																					1																1
899																					3																3
900																					1																1
901																					19																19
902																					1																1
903																					1																1
904																					10																10
905																					1																1
906																					1																1
907																					2																2
908																					1																1
909																					1																1
910																					1																1
911																					1																1
912																					24																24
913																					1																1
914																					1																1
915																					1																1
916																					1																1
917																					1																1
918																					1																1
919																					6																6
920																					1																1
921																					1																1
922																					1																1
923																					1																1
924																					1																1
925																					1																1
926																					1																1
927																					1																1
928																					1																1
929																					1																1
930																					1																1
931																					1																1
932																					2																2
933																					2																2
934																					2																2
935																					2																2
936																					1																1
937																					2																2
938																					1																1
939																					5																5
940																					1																1
941																					1																1
942																					1																1
943																					1																1
944																					1																1
945																					1																1
946																					1																1
947																					1																1
948																					4																4
949																					1																1
950																					4																4
951																					1																1
952																					28																28
953																					1																1
954																					1																1
955																					2																2
956																					1																1
957																					1																1
958																					2																2
959																					4																4
960																					6																6
961																					1																1
962																					1																1
963																					1																1
964																					1																1
965																					1																1
968																					1																1
969																					1																1
970																					1																1
971																					1																1
972																					6																6
973																					1																1
974																					1																1
975																					1																1
976																					1																1
977																					1																1
978																					4																4
979																					3																3
980																					1																1
981																					1																1
982																					1																1
983																					9																9
984																		14																			14
985																		4																			4
986																					2																2
987																					1																1
991																					1																1
993																					6																6
994																					1																1
995																					1																1
996																					1																1
997																					7																7
998																					3																3
999																					8																8
1000																					1																1
1001																					1																1
1002																					1																1
1003																					1																1
1004																					1																1
1005																					1																1
1006																					1																1
1007																					1																1
1008																					1																1
1009																					1																1
1010																					1																1
1011																					1																1
1012																					1																1
1013																										6											6
1014																					1																1
1015																					1																1
1016																					1																1
1017																					4																4
1018																					1																1
1019																					5																5
1020																					2																2
1021																					3																3
1022																					2																2
1023									1																												1
1024							1																														1
1025																					1																1
1026																					10																10
1027																					1																1
1028																					3																3
1029																					1																1
1030																					3																3
1031																					2																2
1032																					3																3
1033																					6																6
1034																					8																8
1035																					4																4
1036																					1																1
1037																					6																6
1038																					5																5
1039																					1																1
1040																					1																1
1041																					8																8
1042																					1																1
1043																					1																1
1044																					3																3
1045																					1																1
1046																					1																1
1047																					16																16
1048																										1											1
1049																					1																1
1050																					5																5
1051																					1																1
1052																					1																1
1053																					1																1
1054																					1																1
1055																					1																1
1057																					1																1
1058																					1																1
1069																					1																1
1070																					1																1
1071																					1																1
1072																					1																1
1073																					1																1
1074																					5																5
1075																					2																2
1076																					1																1
1077																					1																1
1078																					2																2
1079																					1																1
1080																					1																1
1081																					1																1
1082																					1																1
1083																					1																1
1084																					2																2
1085																					1																1
1086																					1																1
1087																					1																1
1088																					1																1
1089																					1																1
1090																					1																1
1091																					1																1
1092																					1																1
1093																					1																1
1094																					12																12
1095																					1																1
1096																					1																1
1097																					1																1
1101																					5																5
1102																					1																1
1103																					1																1
1104																					8																8
1105																					1																1
1106																					1																1
1107																					2																2
1108																					1																1
1109																					3																3
1114																					1																1
1115																					1																1
1116																					1																1
1117																					1																1
1118																					1																1
1119																					1																1
1120																					1																1
1121																					1																1
1122																					1																1
1123																					16																16
1124																					1																1
1125																					1																1
1126																					1																1
1127																					1																1
1128																					3																3
1129																					1																1
1130																					1																1
1131																					1																1
1132																					1																1
1133																					1																1
1134																					1																1
1135																					1																1
1136																					1																1
1137																					1																1
1138																					1																1
1139																					4																4
1140																					3																3
1141																					1																1
1142																					2																2
1143																					1																1
1144																					1																1
1145																					1																1
1146																					1																1
1147																					4																4
1148																					1																1
1149																					1																1
1153																					288																288
1154																					6																6
1155																					4																4
1161																					3																3
1162																					2																2
1163																					1																1
1164																					1																1
1165																					12																12
1166																					1																1
1167																		1																			1
1171																					1																1
1172																					1																1
1173																					1																1
1174																					1																1
1175																					7																7
1176																					2																2
1177																					1																1
1178																					1																1
1179																					1																1
1180																					1																1
1181																					26																26
1182																					1																1
1183																					1																1
1184																					1																1
1185																					1																1
1186																					1																1
1187																					1																1
1188																					1																1
1189																					1																1
1190																					1																1
1191																					1																1
1193																					4																4
1194																					1																1
1200																					2																2
1201																		1																			1
1202																		1																			1
1203																					2																2
1204																		16																			16
1205						2																															2
1206																					3																3
1207																					9																9
1208																		4																			4
1209																					4																4
1210																					2																2
1211																					1																1
1212																														1							1
1213																					3																3
1214																														1							1
1215																					8																8
1216																					1																1
1217																					1																1
1218																					3																3
1219																					1																1
1220																					2																2
1221																					18																18
1222																														1							1
1223																														1							1
1224																					1																1
1225																		2																			2
1226																		2																			2
1227										3																											3
1228																														4							4
1230																					6																6
1231																					1																1
1232																					1																1
1233																					1																1
1234																					2																2
1235																					1																1
1236																					1																1
1237																					1																1
1238																					4																4
1239																					2																2
1241																		1																			1
1244							35																														35
1246																					9																9
1286								1																													1
1316																		2																			2
1317																		5																			5
1318																		1																			1
1319																		1																			1
1320																		3																			3
1321																		3																			3
1322																		3																			3
1323																		1																			1
1324																					1																1
1326																					1																1
1328																					1																1
1329																					1																1
1330																					1																1
1331																					8																8
1332																					1																1
1333																					1																1
1334																					2																2
1336																					2																2
1338																					3																3
1339																														1							1
1340																					2																2
1341																		1																			1
1342																					2																2
1343																					3																3
1344																										1											1
1345																		1																			1
1346																					3																3
1347																					5																5
1348																		1																			1
1349																		1																			1
1350																					2																2
1351																					3																3
1352																					1																1
1353																		1																			1
1354																		1																			1
1355																					3																3
1356																					3																3
1357																		1																			1
1358																					4																4
1359																					2																2
1360																					2																2
1361																					2																2
1362																		2																			2
1363																		2																			2
1364																		2																			2
1365																		2																			2
1366																					5																5
1367																		2																			2
1368																					3																3
1369																		2																			2
1370																		2																			2
1371																		1																			1
1372																					1																1
1373																					3																3
1374																					1																1
1375																					5																5
1376																					2																2
1377																					1																1
1378																		1																			1
1379																					1																1
1380																					1																1
1381																					1																1
1382																					3																3
1386							1																														1
1392																					2																2
1394																					1																1
1395																					2																2
1396																					2																2
1397																					2																2
1398																					11																11
1399																					1																1
1400																					1																1
1401																					1																1
1402																					3																3
1403																					2																2
1404																					1																1
1405																					1																1
1406																					13																13
1407																					1																1
1408																					1																1
1409																					2																2
1410																					1																1
1411																					1																1
1412																					1																1
1413																					1																1
1414																					1																1
1416																					2																2
1417																					2																2
1418																					1																1
1419																					7																7
1420																					1																1
1421																					1																1
1422																					1																1
1423																					1																1
1424																					4																4
1425																					1																1
1426																					4																4
1427																					31																31
1428																					2																2
1429																					1																1
1431																					1																1
1432																					3																3
1433																					1																1
1434																					1																1
1436																		1																			1
1438																		2																			2
1439																					1																1
1440																		4																			4
1441																		1																			1
1442																					2																2
1443																		1																			1
1444																		1																			1
1445																		1																			1
1446																		1																			1
1447																		1																			1
1448																					1																1
1449																					2																2
1450																		1																			1
1451																					2																2
1452																					2																2
1453																					2																2
1454																					1																1
1455																		1																			1
1456																					1																1
1457																										5											5
1458																														1							1
1459																					1																1
1460																					7																7
1471							1																														1
1472								3																													3
1478																														2							2
1480																					1																1
1481																					1																1
1482																					3																3
1483																					2																2
1485																					1																1
1487																																2					2
1488																					1																1
1489																					1																1
1490																					1																1
1491																					1																1
1492																					1																1
1493																					1																1
1494																					1																1
1495																					1																1
1496																					4																4
1497																					1																1
1498																					2																2
1499																					1																1
1500																					1																1
1501																					1																1
1502																					5																5
1503																					1																1
1504																					1																1
1505																					1																1
1506																					1																1
1507																					1																1
1508																					1																1
1509																					1																1
1510																					1																1
1511																					2																2
1512																					1																1
1518																					1																1
1521																					1																1
1522																					1																1
1523																					1																1
1524																					1																1
1525																					1																1
1526																					1																1
1527																					1																1
1528																					1																1
1529																					3																3
1530																					2																2
1531																					1																1
1532																					3																3
1533																					1																1
1534																					1																1
1535																					9																9
1536																					1																1
1537																					1																1
1538																					5																5
1539																					2																2
1563																					1																1
1582																					1																1
1583							1																														1
1584																					1																1
1585																					1																1
1586																		1																			1
1587																					1																1
1588																					1																1
1590																					3																3
1591																					1																1
1592																		5																			5
1593																		5																			5
1594																					6																6
1595																					1																1
1596																					4																4
1597																					1																1
1598																		2																			2
1599																					1																1
1600																					1																1
1601																					1																1
1602																					1																1
1603																		1																			1
1604																					1																1
1605																					2																2
1606																		1																			1
1607																					1																1
1608																		1																			1
1609																					1																1
1610																					1																1
1611																		1																			1
1612																		1																			1
1613																					1																1
1614																					1																1
1615																		1																			1
1616																		1																			1
1617																					2																2
1618																		1																			1
1619																					2																2
1620																		1																			1
1621																					1																1
1622																					3																3
1623																		1																			1
1624																					1																1
1625																		1																			1
1626																		2																			2
1627																					1																1
1628																					1																1
1629																		1																			1
1630																		1																			1
1631																		1																			1
1632																		1																			1
1633																		1																			1
1634																		1																			1
1635																					2																2
1636																		1																			1
1637																					1																1
1638																					1																1
1639																					1																1
1640																					2																2
1641																		1																			1
1642																					3																3
1643																					2																2
1644																					1																1
1645																					3																3
1646																					4																4
1647																					1																1
1648																					1																1
1649																					1																1
1650																		3																			3
1651																					4																4
1652																					1																1
1653																					1																1
1654																		1																			1
1655																					1																1
1656																					2																2
1657																					1																1
1658																		1																			1
1659																					1																1
1660																					3																3
1661																					2																2
1662																					1																1
1663																					1																1
1664																					2																2
1665																		1																			1
1666																					1																1
1667																					1																1
1668																					1																1
1669																					1																1
1670																					3																3
1671																					1																1
1672																					1																1
1673																					1																1
1674																					1																1
1675																					1																1
1676																		1																			1
1677																					1																1
1678																		1																			1
1679																		1																			1
1680																		1																			1
1681																					2																2
1682																					1																1
1686																					1																1
1687																					1																1
1688																					1																1
1689																					1																1
1690																					1																1
1693																					1																1
1694																					2																2
1695																					1																1
1696																					1																1
1697																					1																1
1699																					1																1
1700																		1																			1
1701										4																											4
1702																		1																			1
1703																		2																			2
1704																					1																1
1705																					1																1
1706																					1																1
1707																					1																1
1708																														2							2
1709																					1																1
1710																					2																2
1711										1																											1
1712																					1																1
1713																					2																2
1714																		2																			2
1715																		1																			1
1716																		1																			1
1717																					2																2
1720																					1																1
1721																					1																1
1723																					3																3
1724																					6																6
1726																					2																2
1728																					1																1
1732																					3																3
1734																					1																1
1736																					1																1
1738																					6																6
1742																					1																1
1743																					2																2
1744																					1																1
1746																					2																2
1748																					1																1
1751																					1																1
1753																					3																3
1755																					2																2
1756																					1																1
1757																					1																1
1765																					1																1
1766																					1																1
1767																					3																3
1768																					1																1
1769																					1																1
1770																					1																1
1771																					1																1
1772																					1																1
1776																					1																1
1777																					2																2
1778																					1																1
1790																					3																3
1792																					2																2
1793																					4																4
1794																					1																1
1798																		1																			1
1799																					1																1
1804																					3																3
1805																					3																3
1806																					2																2
1807																					1																1
1808																					1																1
1809																					1																1
1810																					1																1
1811																					1																1
1812																					1																1
1813																					5																5
1814																					1																1
1818																					1																1
1819																					1																1
1820																					1																1
1821																					1																1
1822																					2																2
1823																					1																1
1824																					1																1
1825																					2																2
1826																					5																5
1827																					2																2
1828																					7																7
1829																					2																2
1830																					1																1
1831																					4																4
1832																					47																47
1833																					3																3
1834																					1																1
1835																					1																1
1836																					1																1
1837																					3																3
1838																					3																3
1839																					1																1
1840																					1																1
1841																					1																1
1842																					1																1
1843																					1																1
1844																					1																1
1845																					1																1
1846																					1																1
1847																					1																1
1848																					1																1
1849																					3																3
1850																					2																2
1851																					2																2
1852																					1																1
1853																										1											1
1854																					1																1
1855																					1																1
1856																					2																2
1859																					1																1
1861																					2																2
1862																					2																2
1863																					11																11
1864																					1																1
1865																					1																1
1868																					1																1
1869																										1											1
1870																					1																1
1871																															8						8
1872																															1						1
1873																										2											2
1874																										5											5
1875																										1											1
1876																				1																	1
1877																										2											2
1878					2																																2
1879																										1											1
1880																										1											1
1881																										1											1
1882																					1																1
1883																					2																2
1884																					1																1
1885																					2																2
1886																					5																5
1887																					1																1
1890																					4																4
1891																					3																3
1892																					1																1
1895																					1																1
1903																					1																1
1904																					1																1
1905																					1																1
1906																					1																1
1907																					1																1
1908																					1																1
1909																					1																1
1910																					1																1
1911																					1																1
1912																					1																1
1913																					1																1
1914																					2																2
1915																					6																6
1917																					1																1
1918																					1																1
1920																					2																2
1921																					1																1
1922																					3																3
1924																					5																5
1926																					1																1
1930																					1																1
1931																					1																1
1932																					3																3
1933																					1																1
1934																					1																1
1935																					1																1
1936																					1																1
1937																					4																4
1938																					3																3
1939																					1																1
1942																					4																4
1945																					2																2
1954																					1																1
1956																					1																1
1958																					1																1
1959																					1																1
1960																					2																2
1961																					1																1
1962																					1																1
1963																					9																9
1976																					1																1
1977																					1																1
1978																					1																1
1979																					2																2
1980																					3																3
1981																					1																1
1982																					1																1
1983																					1																1
1984																					2																2
1985																					2																2
1986																					4																4
1987																					6																6
1989																					1																1
1994																					6																6
1996																					3																3
1997																					1																1
1998																					1																1
1999																					2																2
2000																					1																1
2001																					1																1
2002																					1																1
2003																					1																1
2004																					1																1
2005																					2																2
2006																					1																1
2007																					2																2
2008																					1																1
2009																					1																1
2010																					1																1
2011																					1																1
2012																					1																1
2013																					1																1
2015																					1																1
2018																					1																1
2019																					1																1
2020																					1																1
2021																					2																2
2023																					3																3
2024																					1																1
2025																					2																2
2026																					1																1
2027																					1																1
2028																					1																1
2029																					1																1
2030																					1																1
2031																					1																1
2032																					1																1
2033																					1																1
2034																					1																1
2035																					1																1
2038																					2																2
2039												1																									1
2042																					1																1
2043																					1																1
2044																					1																1
2045																					1																1
2046																					1																1
2047																					1																1
2048																					1																1
2049																					1																1
2050																					2																2
2051																					1																1
2052																					2																2
2053																					1																1
2054																					1																1
2055																					1																1
2056																					1																1
2057																					2																2
2058																					3																3
2065																					1																1
2066																					1																1
2067																					2																2
2068																					1																1
2069																					1																1
2070																					1																1
2073																					1																1
2075																					1																1
2076																					1																1
2077																					1																1
2078																					1																1
2082																					1																1
2084																					1																1
2085																					1																1
2089																					1																1
2090																					1																1
2091																					2																2
2092																					1																1
2093																					4																4
2094																					1																1
2095																					11																11
2096																					2																2
2097																					1																1
2098																					1																1
2099																					1																1
2100																					1																1
2101																					4																4
2102																					2																2
2103																					2																2
2104																					2																2
2105																					4																4
2106																					2																2
2107																					3																3
2108																					6																6
2109																					3																3
2110																					2																2
2111																					1																1
2112																					1																1
2113																					1																1
2116																					1																1
2117																					1																1
2118																					1																1
2119																					1																1
2120																					1																1
2122																					1																1
2127																					5																5
2128																					1																1
2129																					2																2
2130																					1																1
2131																					3																3
2132																					1																1
2133																					1																1
[truncated: 749 more rows]
