# Supplementary material for: pilE G-Quadruplex Is Recognized and Preferentially Bound but Not Processed by the MutL Endonuclease from Neisseria gonorrhoeae Mismatch Repair Pathway
Source: Int J Mol Sci. 2023 Mar 24;24(7):6167. doi: 10.3390/ijms24076167 (PMC10094033; doi:10.3390/ijms24076167)
Supplement: Supplementary file 1 [file ijms-24-06167-s001.zip › Table S2.xlsx]

## Sheet: Breakdown
Breakdown of NEIS1378 by species:
Selected options: Display values and percentages. Calculate percentages by dataset.
NEIS1378		species
	Neisseria meningitidis	Neisseria animalis	Neisseria animaloris	Neisseria bacilliformis	Neisseria basseii	Neisseria benedictiae	Neisseria bergeri	Neisseria blantyrii	Neisseria canis	Neisseria cinerea	Neisseria dentiae	Neisseria elongata	Neisseria elongata subsp. elongata	Neisseria elongata subsp. glycolytica	Neisseria elongata subsp. nitroreducens	Neisseria flavescens	Neisseria gonorrhoeae	Neisseria iguanae	Neisseria lactamica	Neisseria maigaei	Neisseria mucosa	Neisseria musculi	Neisseria oralis	Neisseria polysaccharea	Neisseria shayeganii	Neisseria sicca	Neisseria sp.	Neisseria subflava	Neisseria uirgultaei	Neisseria viridiae	Neisseria wadsworthii	Neisseria weaveri	Neisseria zoodegmatis	Non-Neisseria sp.	Total
57																	904 (1.9%)																		904 (1.9%)
1300																	9 (0.0%)																		9 (0.0%)
1768																	9 (0.0%)																		9 (0.0%)
547																	81 (0.2%)																		81 (0.2%)
720																	80 (0.2%)																		80 (0.2%)
537																	8 (0.0%)																		8 (0.0%)
548																	8 (0.0%)																		8 (0.0%)
560																	8 (0.0%)																		8 (0.0%)
567																	8 (0.0%)																		8 (0.0%)
1519																	8 (0.0%)																		8 (0.0%)
2212																	8 (0.0%)																		8 (0.0%)
313																	77 (0.2%)																		77 (0.2%)
311																	70 (0.1%)																		70 (0.1%)
378																	70 (0.1%)																		70 (0.1%)
726																	7 (0.0%)																		7 (0.0%)
1648																	7 (0.0%)																		7 (0.0%)
1661																	7 (0.0%)																		7 (0.0%)
1731																	7 (0.0%)																		7 (0.0%)
1747																	7 (0.0%)																		7 (0.0%)
1752																	7 (0.0%)																		7 (0.0%)
1772																	7 (0.0%)																		7 (0.0%)
1865																	7 (0.0%)																		7 (0.0%)
56																	696 (1.5%)																		696 (1.5%)
51																	6748 (14.2%)										1 (0.0%)								6749 (14.2%)
893																	65 (0.1%)																		65 (0.1%)
535	1																648 (1.4%)																		649 (1.4%)
527																	6 (0.0%)																		6 (0.0%)
531																	6 (0.0%)																		6 (0.0%)
552																	6 (0.0%)																		6 (0.0%)
725																	6 (0.0%)																		6 (0.0%)
732																	6 (0.0%)																		6 (0.0%)
1268																	6 (0.0%)																		6 (0.0%)
1866																	6 (0.0%)																		6 (0.0%)
528																	52 (0.1%)																		52 (0.1%)
575																	52 (0.1%)																		52 (0.1%)
54																	5 (0.0%)																		5 (0.0%)
556																	5 (0.0%)																		5 (0.0%)
1297																	5 (0.0%)																		5 (0.0%)
1517																	5 (0.0%)																		5 (0.0%)
1660																	5 (0.0%)																		5 (0.0%)
1921																	5 (0.0%)																		5 (0.0%)
2231																	5 (0.0%)																		5 (0.0%)
263	4																47 (0.1%)																		51 (0.1%)
529																	46 (0.1%)																		46 (0.1%)
1277	1																43 (0.1%)																		44 (0.1%)
530																	42 (0.1%)																		42 (0.1%)
310																	4 (0.0%)																		4 (0.0%)
536																	4 (0.0%)																		4 (0.0%)
543																	4 (0.0%)																		4 (0.0%)
564																	4 (0.0%)																		4 (0.0%)
1303																	4 (0.0%)																		4 (0.0%)
1411																	4 (0.0%)																		4 (0.0%)
1560																	4 (0.0%)																		4 (0.0%)
1732																	4 (0.0%)																		4 (0.0%)
1742																	4 (0.0%)																		4 (0.0%)
1770																	4 (0.0%)																		4 (0.0%)
1771																	4 (0.0%)																		4 (0.0%)
539																	38 (0.1%)																		38 (0.1%)
551																	38 (0.1%)																		38 (0.1%)
563	1																373 (0.8%)																		374 (0.8%)
1269																	35 (0.1%)																		35 (0.1%)
1302																	33 (0.1%)																		33 (0.1%)
55																	32 (0.1%)																		32 (0.1%)
538																	31 (0.1%)																		31 (0.1%)
526																	3 (0.0%)																		3 (0.0%)
557																	3 (0.0%)																		3 (0.0%)
562																	3 (0.0%)																		3 (0.0%)
723																	3 (0.0%)																		3 (0.0%)
724																	3 (0.0%)																		3 (0.0%)
798																	3 (0.0%)																		3 (0.0%)
892																	3 (0.0%)																		3 (0.0%)
1272																	3 (0.0%)																		3 (0.0%)
1273																	3 (0.0%)																		3 (0.0%)
1279																	3 (0.0%)																		3 (0.0%)
1304																	3 (0.0%)																		3 (0.0%)
1305																	3 (0.0%)																		3 (0.0%)
1307																	3 (0.0%)																		3 (0.0%)
1516																	3 (0.0%)																		3 (0.0%)
1658																	3 (0.0%)																		3 (0.0%)
1733																	3 (0.0%)																		3 (0.0%)
1757																	3 (0.0%)																		3 (0.0%)
1895																	3 (0.0%)																		3 (0.0%)
1905																	3 (0.0%)																		3 (0.0%)
2018																	3 (0.0%)																		3 (0.0%)
2020																	3 (0.0%)																		3 (0.0%)
2073																	3 (0.0%)																		3 (0.0%)
534																	27 (0.1%)																		27 (0.1%)
541																	230 (0.5%)																		230 (0.5%)
1243																	23 (0.0%)																		23 (0.0%)
58																	22 (0.0%)																		22 (0.0%)
559																	22 (0.0%)																		22 (0.0%)
1151																	22 (0.0%)																		22 (0.0%)
52																	2194 (4.6%)																		2194 (4.6%)
533																	2 (0.0%)																		2 (0.0%)
550																	2 (0.0%)																		2 (0.0%)
553																	2 (0.0%)																		2 (0.0%)
565																	2 (0.0%)																		2 (0.0%)
568																	2 (0.0%)																		2 (0.0%)
569																	2 (0.0%)																		2 (0.0%)
571																	2 (0.0%)																		2 (0.0%)
718																	2 (0.0%)																		2 (0.0%)
719																	2 (0.0%)																		2 (0.0%)
956																	2 (0.0%)																		2 (0.0%)
1244																	2 (0.0%)																		2 (0.0%)
1267																	2 (0.0%)																		2 (0.0%)
1298																	2 (0.0%)																		2 (0.0%)
1308																	2 (0.0%)																		2 (0.0%)
1309																	2 (0.0%)																		2 (0.0%)
1488																	2 (0.0%)																		2 (0.0%)
1563																	2 (0.0%)																		2 (0.0%)
1662																	2 (0.0%)																		2 (0.0%)
1735																	2 (0.0%)																		2 (0.0%)
1737																	2 (0.0%)																		2 (0.0%)
1738																	2 (0.0%)																		2 (0.0%)
1741																	2 (0.0%)																		2 (0.0%)
1749																	2 (0.0%)																		2 (0.0%)
1753																	2 (0.0%)																		2 (0.0%)
1762																	2 (0.0%)																		2 (0.0%)
1773																	2 (0.0%)																		2 (0.0%)
1774																	2 (0.0%)																		2 (0.0%)
1852																	2 (0.0%)																		2 (0.0%)
1857																	2 (0.0%)																		2 (0.0%)
1894																	2 (0.0%)																		2 (0.0%)
1903																	2 (0.0%)																		2 (0.0%)
1907																	2 (0.0%)																		2 (0.0%)
1914																	2 (0.0%)																		2 (0.0%)
1915																	2 (0.0%)																		2 (0.0%)
1916																	2 (0.0%)																		2 (0.0%)
1924																	2 (0.0%)																		2 (0.0%)
1926																	2 (0.0%)																		2 (0.0%)
1929																	2 (0.0%)																		2 (0.0%)
1995																	2 (0.0%)																		2 (0.0%)
2015																	2 (0.0%)																		2 (0.0%)
2036																	2 (0.0%)																		2 (0.0%)
2214																	2 (0.0%)																		2 (0.0%)
2242																	2 (0.0%)																		2 (0.0%)
2333																	2 (0.0%)																		2 (0.0%)
2336																	2 (0.0%)																		2 (0.0%)
2352																	2 (0.0%)																		2 (0.0%)
566																	19 (0.0%)																		19 (0.0%)
1486																	19 (0.0%)																		19 (0.0%)
1651																	19 (0.0%)																		19 (0.0%)
1893																	18 (0.0%)																		18 (0.0%)
532																	16 (0.0%)																		16 (0.0%)
1851																	16 (0.0%)																		16 (0.0%)
Total	30534	1 (0.0%)	1 (0.0%)	4 (0.0%)	2 (0.0%)	3 (0.0%)	61 (0.1%)	14 (0.0%)	2 (0.0%)	40 (0.1%)	1 (0.0%)	2 (0.0%)	1 (0.0%)	1 (0.0%)	1 (0.0%)	1 (0.0%)	15972 (33.6%)	1 (0.0%)	685 (1.4%)	1 (0.0%)	27 (0.1%)	8 (0.0%)	6 (0.0%)	69 (0.1%)	1 (0.0%)	1 (0.0%)	19 (0.0%)	61 (0.1%)	9 (0.0%)	21 (0.0%)	1 (0.0%)	1 (0.0%)	2 (0.0%)	3 (0.0%)	47557 (100%)
1565																	15 (0.0%)																		15 (0.0%)
1597																	15 (0.0%)																		15 (0.0%)
1755																	15 (0.0%)																		15 (0.0%)
379																	148 (0.3%)																		148 (0.3%)
561																	13 (0.0%)																		13 (0.0%)
549																	126 (0.3%)																		126 (0.3%)
702																	12 (0.0%)																		12 (0.0%)
721																	12 (0.0%)																		12 (0.0%)
1266																	12 (0.0%)																		12 (0.0%)
1278																	12 (0.0%)																		12 (0.0%)
545																	11 (0.0%)																		11 (0.0%)
53	1																1027 (2.2%)																		1028 (2.2%)
No value	2114	1 (0.0%)	1 (0.0%)				4 (0.0%)		2 (0.0%)	27 (0.1%)	1 (0.0%)	2 (0.0%)	1 (0.0%)	1 (0.0%)	1 (0.0%)	1 (0.0%)	1025 (2.2%)	1 (0.0%)	82 (0.2%)		11 (0.0%)	8 (0.0%)	3 (0.0%)	12 (0.0%)	1 (0.0%)	1 (0.0%)	17 (0.0%)	26 (0.1%)	1 (0.0%)		1 (0.0%)	1 (0.0%)	2 (0.0%)	3 (0.0%)	3351 (7.0%)
573																	10 (0.0%)																		10 (0.0%)
1487																	10 (0.0%)																		10 (0.0%)
2016																	10 (0.0%)																		10 (0.0%)
309																	1 (0.0%)																		1 (0.0%)
312																	1 (0.0%)																		1 (0.0%)
540																	1 (0.0%)																		1 (0.0%)
542																	1 (0.0%)																		1 (0.0%)
544																	1 (0.0%)																		1 (0.0%)
546																	1 (0.0%)																		1 (0.0%)
554																	1 (0.0%)																		1 (0.0%)
555																	1 (0.0%)																		1 (0.0%)
558																	1 (0.0%)																		1 (0.0%)
570																	1 (0.0%)																		1 (0.0%)
572																	1 (0.0%)																		1 (0.0%)
574																	1 (0.0%)																		1 (0.0%)
576																	1 (0.0%)																		1 (0.0%)
701																	1 (0.0%)																		1 (0.0%)
703																	1 (0.0%)																		1 (0.0%)
722																	1 (0.0%)																		1 (0.0%)
728																	1 (0.0%)																		1 (0.0%)
729																	1 (0.0%)																		1 (0.0%)
730																	1 (0.0%)																		1 (0.0%)
731																	1 (0.0%)																		1 (0.0%)
955																	1 (0.0%)																		1 (0.0%)
957																	1 (0.0%)																		1 (0.0%)
958																	1 (0.0%)																		1 (0.0%)
1242																	1 (0.0%)																		1 (0.0%)
1270																	1 (0.0%)																		1 (0.0%)
1271																	1 (0.0%)																		1 (0.0%)
1274																	1 (0.0%)																		1 (0.0%)
1280																	1 (0.0%)																		1 (0.0%)
1299																	1 (0.0%)																		1 (0.0%)
1301																	1 (0.0%)																		1 (0.0%)
1306																	1 (0.0%)																		1 (0.0%)
1390																	1 (0.0%)																		1 (0.0%)
1436																	1 (0.0%)																		1 (0.0%)
1456																	1 (0.0%)																		1 (0.0%)
1518																	1 (0.0%)																		1 (0.0%)
1562																	1 (0.0%)																		1 (0.0%)
1564																	1 (0.0%)																		1 (0.0%)
1591																	1 (0.0%)																		1 (0.0%)
1631																	1 (0.0%)																		1 (0.0%)
1632																	1 (0.0%)																		1 (0.0%)
1652																	1 (0.0%)																		1 (0.0%)
1659																	1 (0.0%)																		1 (0.0%)
1663																	1 (0.0%)																		1 (0.0%)
1664																	1 (0.0%)																		1 (0.0%)
1665																	1 (0.0%)																		1 (0.0%)
1683																	1 (0.0%)																		1 (0.0%)
1734																	1 (0.0%)																		1 (0.0%)
1736																	1 (0.0%)																		1 (0.0%)
1739																	1 (0.0%)																		1 (0.0%)
1740																	1 (0.0%)																		1 (0.0%)
1743																	1 (0.0%)																		1 (0.0%)
1744																	1 (0.0%)																		1 (0.0%)
1745																	1 (0.0%)																		1 (0.0%)
1746																	1 (0.0%)																		1 (0.0%)
1748																	1 (0.0%)																		1 (0.0%)
1750																	1 (0.0%)																		1 (0.0%)
1751																	1 (0.0%)																		1 (0.0%)
1754																	1 (0.0%)																		1 (0.0%)
1756																	1 (0.0%)																		1 (0.0%)
1758																	1 (0.0%)																		1 (0.0%)
1759																	1 (0.0%)																		1 (0.0%)
1760																	1 (0.0%)																		1 (0.0%)
1761																	1 (0.0%)																		1 (0.0%)
1764																	1 (0.0%)																		1 (0.0%)
1765																	1 (0.0%)																		1 (0.0%)
1766																	1 (0.0%)																		1 (0.0%)
1767																	1 (0.0%)																		1 (0.0%)
1769																	1 (0.0%)																		1 (0.0%)
1854																	1 (0.0%)																		1 (0.0%)
1855																	1 (0.0%)																		1 (0.0%)
1856																	1 (0.0%)																		1 (0.0%)
1896																	1 (0.0%)																		1 (0.0%)
1897																	1 (0.0%)																		1 (0.0%)
1898																	1 (0.0%)																		1 (0.0%)
1899																	1 (0.0%)																		1 (0.0%)
1900																	1 (0.0%)																		1 (0.0%)
1901																	1 (0.0%)																		1 (0.0%)
1902																	1 (0.0%)																		1 (0.0%)
1904																	1 (0.0%)																		1 (0.0%)
1906																	1 (0.0%)																		1 (0.0%)
1908																	1 (0.0%)																		1 (0.0%)
1909																	1 (0.0%)																		1 (0.0%)
1910																	1 (0.0%)																		1 (0.0%)
1911																	1 (0.0%)																		1 (0.0%)
1912																	1 (0.0%)																		1 (0.0%)
1913																	1 (0.0%)																		1 (0.0%)
1917																	1 (0.0%)																		1 (0.0%)
1918																	1 (0.0%)																		1 (0.0%)
1919																	1 (0.0%)																		1 (0.0%)
1920																	1 (0.0%)																		1 (0.0%)
1922																	1 (0.0%)																		1 (0.0%)
1923																	1 (0.0%)																		1 (0.0%)
1925																	1 (0.0%)																		1 (0.0%)
1927																	1 (0.0%)																		1 (0.0%)
1928																	1 (0.0%)																		1 (0.0%)
1996																	1 (0.0%)																		1 (0.0%)
2005																	1 (0.0%)																		1 (0.0%)
2010																	1 (0.0%)																		1 (0.0%)
2011																	1 (0.0%)																		1 (0.0%)
2014																	1 (0.0%)																		1 (0.0%)
2017																	1 (0.0%)																		1 (0.0%)
2019																	1 (0.0%)																		1 (0.0%)
2021																	1 (0.0%)																		1 (0.0%)
2034																	1 (0.0%)																		1 (0.0%)
2037																	1 (0.0%)																		1 (0.0%)
2038																	1 (0.0%)																		1 (0.0%)
2039																	1 (0.0%)																		1 (0.0%)
2057																	1 (0.0%)																		1 (0.0%)
2074																	1 (0.0%)																		1 (0.0%)
2075																	1 (0.0%)																		1 (0.0%)
2080																	1 (0.0%)																		1 (0.0%)
2164																	1 (0.0%)																		1 (0.0%)
2165																	1 (0.0%)																		1 (0.0%)
2166																	1 (0.0%)																		1 (0.0%)
2167																	1 (0.0%)																		1 (0.0%)
2183																	1 (0.0%)																		1 (0.0%)
2184																	1 (0.0%)																		1 (0.0%)
2204																	1 (0.0%)																		1 (0.0%)
2205																	1 (0.0%)																		1 (0.0%)
2207																	1 (0.0%)																		1 (0.0%)
2217																	1 (0.0%)																		1 (0.0%)
2218																	1 (0.0%)																		1 (0.0%)
2219																	1 (0.0%)																		1 (0.0%)
2232																	1 (0.0%)																		1 (0.0%)
2235																	1 (0.0%)																		1 (0.0%)
2237																	1 (0.0%)																		1 (0.0%)
2238																	1 (0.0%)																		1 (0.0%)
2239																	1 (0.0%)																		1 (0.0%)
2240																	1 (0.0%)																		1 (0.0%)
2247																	1 (0.0%)																		1 (0.0%)
2270																	1 (0.0%)																		1 (0.0%)
2312																	1 (0.0%)																		1 (0.0%)
2314																	1 (0.0%)																		1 (0.0%)
2315																	1 (0.0%)																		1 (0.0%)
2316																	1 (0.0%)																		1 (0.0%)
2317																	1 (0.0%)																		1 (0.0%)
2330																	1 (0.0%)																		1 (0.0%)
2331																	1 (0.0%)																		1 (0.0%)
2337																	1 (0.0%)																		1 (0.0%)
2338																	1 (0.0%)																		1 (0.0%)
2346																	1 (0.0%)																		1 (0.0%)
2347																	1 (0.0%)																		1 (0.0%)
2348																	1 (0.0%)																		1 (0.0%)
2349																	1 (0.0%)																		1 (0.0%)
2350																	1 (0.0%)																		1 (0.0%)
2351																	1 (0.0%)																		1 (0.0%)
2353																	1 (0.0%)																		1 (0.0%)
2354																	1 (0.0%)																		1 (0.0%)
2355																	1 (0.0%)																		1 (0.0%)
2356																	1 (0.0%)																		1 (0.0%)
1	6347																																		6347 (13.3%)
6	2418																																		2418 (5.1%)
149	2217																																		2217 (4.7%)
19	1892																																		1892 (4.0%)
161	988																																		988 (2.1%)
124	978																																		978 (2.1%)
126	745																																		745 (1.6%)
28	677																																		677 (1.4%)
42	543																																		543 (1.1%)
125	492																																		492 (1.0%)
60	459																																		459 (1.0%)
128	406																																		406 (0.9%)
7	397																																		397 (0.8%)
625	392																																		392 (0.8%)
44	389																																		389 (0.8%)
133	332																																		332 (0.7%)
43	325																																		325 (0.7%)
116	269																																		269 (0.6%)
210	262																																		262 (0.6%)
59	259																																		259 (0.5%)
845	248																																		248 (0.5%)
41	246																																		246 (0.5%)
259	242																																		242 (0.5%)
121	239																																		239 (0.5%)
4	221																																		221 (0.5%)
31	192																																		192 (0.4%)
36	184																																		184 (0.4%)
114	170																																		170 (0.4%)
856	158																																		158 (0.3%)
127	156																																		156 (0.3%)
234	126																																		126 (0.3%)
29	114																																		114 (0.2%)
315	114																																		114 (0.2%)
220	108																																		108 (0.2%)
322	107																																		107 (0.2%)
159	106																																		106 (0.2%)
39	93																																		93 (0.2%)
171	84																																		84 (0.2%)
16	82																																		82 (0.2%)
268	80																																		80 (0.2%)
354	79																																		79 (0.2%)
166	77																																		77 (0.2%)
18	75																																		75 (0.2%)
21	69																																		69 (0.1%)
372	67																																		67 (0.1%)
63	66																																		66 (0.1%)
157	61																																		61 (0.1%)
224	56																																		56 (0.1%)
5	54																																		54 (0.1%)
103	53																							4 (0.0%)											57 (0.1%)
641	53																																		53 (0.1%)
30	51																																		51 (0.1%)
168	50																																		50 (0.1%)
352	50																																		50 (0.1%)
506	47																																		47 (0.1%)
222	46																																		46 (0.1%)
367	46																																		46 (0.1%)
131	44																																		44 (0.1%)
152	43																																		43 (0.1%)
256	43																																		43 (0.1%)
27	40																																		40 (0.1%)
333	40																																		40 (0.1%)
2	37																																		37 (0.1%)
516	37																																		37 (0.1%)
11	36																																		36 (0.1%)
298	36																																		36 (0.1%)
437	34																																		34 (0.1%)
943	34																																		34 (0.1%)
138	31																																		31 (0.1%)
153	30																																		30 (0.1%)
990	30																																		30 (0.1%)
17	27																																		27 (0.1%)
365	27																																		27 (0.1%)
380	27																																		27 (0.1%)
421	27																																		27 (0.1%)
428	26																																		26 (0.1%)
301	25																																		25 (0.1%)
308	25																																		25 (0.1%)
648	25																																		25 (0.1%)
24	23																																		23 (0.0%)
50	23																																		23 (0.0%)
167	22																																		22 (0.0%)
223	22																																		22 (0.0%)
764	22																																		22 (0.0%)
1012	22																																		22 (0.0%)
118	21																																		21 (0.0%)
229	21																																		21 (0.0%)
213	20																																		20 (0.0%)
580	20																																		20 (0.0%)
583	19																																		19 (0.0%)
1993	19																																		19 (0.0%)
227	18																																		18 (0.0%)
237	18																																		18 (0.0%)
238	18																																		18 (0.0%)
348	18																																		18 (0.0%)
778	18																																		18 (0.0%)
9	17																																		17 (0.0%)
1847	17																																		17 (0.0%)
2358	17																																		17 (0.0%)
631	16																																		16 (0.0%)
993	16																																		16 (0.0%)
1209	16																																		16 (0.0%)
35	15																																		15 (0.0%)
135	15																																		15 (0.0%)
399	15																																		15 (0.0%)
644	15																																		15 (0.0%)
816	14																																		14 (0.0%)
1693	14																																		14 (0.0%)
26	13																																		13 (0.0%)
172	13																																		13 (0.0%)
849	13																																		13 (0.0%)
1006	13																																		13 (0.0%)
1780	13																																		13 (0.0%)
134	12																																		12 (0.0%)
289	12																																		12 (0.0%)
316	12																																		12 (0.0%)
357	12																																		12 (0.0%)
387	12																																		12 (0.0%)
494	12																																		12 (0.0%)
661	12																																		12 (0.0%)
774	12																																		12 (0.0%)
985	12																																		12 (0.0%)
291	11																																		11 (0.0%)
317	11																																		11 (0.0%)
488	11																																		11 (0.0%)
1728	11																																		11 (0.0%)
2109	11																																		11 (0.0%)
283	10																																		10 (0.0%)
356	10																																		10 (0.0%)
1520	10																																		10 (0.0%)
1703	10																																		10 (0.0%)
137	9																																		9 (0.0%)
358	9																																		9 (0.0%)
369	9																																		9 (0.0%)
396	9																																		9 (0.0%)
407	9																																		9 (0.0%)
466	9																																		9 (0.0%)
1588	9																																		9 (0.0%)
64	8																																		8 (0.0%)
297	8																																		8 (0.0%)
355	8																																		8 (0.0%)
364	8																																		8 (0.0%)
388	8																																		8 (0.0%)
390	8																																		8 (0.0%)
431	8																																		8 (0.0%)
469	8																																		8 (0.0%)
477	8																																		8 (0.0%)
917	8																																		8 (0.0%)
964	8																																		8 (0.0%)
1460	8																																		8 (0.0%)
150	7																																		7 (0.0%)
196	7																																		7 (0.0%)
381	7																																		7 (0.0%)
476	7																																		7 (0.0%)
592	7																																		7 (0.0%)
649	7																																		7 (0.0%)
768	7																																		7 (0.0%)
801	7																																		7 (0.0%)
916	7																																		7 (0.0%)
1129	7																																		7 (0.0%)
34	6																																		6 (0.0%)
49	6																																		6 (0.0%)
376	6																																		6 (0.0%)
384	6																																		6 (0.0%)
453	6																																		6 (0.0%)
478	6																																		6 (0.0%)
515	6																																		6 (0.0%)
521	6																																		6 (0.0%)
617	6																																		6 (0.0%)
666	6																																		6 (0.0%)
707	6																																		6 (0.0%)
709	6																																		6 (0.0%)
839	6																																		6 (0.0%)
989	6																																		6 (0.0%)
1314	6																																		6 (0.0%)
1322	6																																		6 (0.0%)
1570	6																																		6 (0.0%)
1949	6																																		6 (0.0%)
2359	6																																		6 (0.0%)
189	5																																		5 (0.0%)
212	5																																		5 (0.0%)
257	5																																		5 (0.0%)
288	5																																		5 (0.0%)
360	5																																		5 (0.0%)
377	5																																		5 (0.0%)
389	5																																		5 (0.0%)
455	5																																		5 (0.0%)
462	5																																		5 (0.0%)
468	5																																		5 (0.0%)
473	5																																		5 (0.0%)
579	5																																		5 (0.0%)
585	5																																		5 (0.0%)
587	5																																		5 (0.0%)
590	5																																		5 (0.0%)
628	5																																		5 (0.0%)
846	5																																		5 (0.0%)
873	5																																		5 (0.0%)
979	5																																		5 (0.0%)
986	5																																		5 (0.0%)
995	5																																		5 (0.0%)
1155	5																																		5 (0.0%)
1695	5																																		5 (0.0%)
1696	5																																		5 (0.0%)
2024	5																																		5 (0.0%)
2107	5																																		5 (0.0%)
38	4																																		4 (0.0%)
122	4																																		4 (0.0%)
123	4																																		4 (0.0%)
199	4																																		4 (0.0%)
207	4																																		4 (0.0%)
232	4																																		4 (0.0%)
240	4																																		4 (0.0%)
255	4																																		4 (0.0%)
260	4																																		4 (0.0%)
266	4																																		4 (0.0%)
270	4																																		4 (0.0%)
273	4																																		4 (0.0%)
287	4																																		4 (0.0%)
292	4																																		4 (0.0%)
295	4																																		4 (0.0%)
303	4																																		4 (0.0%)
314	4																																		4 (0.0%)
334	4																																		4 (0.0%)
404	4																																		4 (0.0%)
416	4																																		4 (0.0%)
452	4																																		4 (0.0%)
464	4																																		4 (0.0%)
581	4																																		4 (0.0%)
618	4																																		4 (0.0%)
632	4																																		4 (0.0%)
654	4																																		4 (0.0%)
667	4																																		4 (0.0%)
674	4																																		4 (0.0%)
787	4																																		4 (0.0%)
944	4																																		4 (0.0%)
980	4																																		4 (0.0%)
1133	4																																		4 (0.0%)
1293	4																																		4 (0.0%)
1328	4																																		4 (0.0%)
1528	4																																		4 (0.0%)
1532	4																																		4 (0.0%)
1637	4																																		4 (0.0%)
1691	4																																		4 (0.0%)
1711	4																																		4 (0.0%)
1789	4																																		4 (0.0%)
1976	4																																		4 (0.0%)
2003	4																																		4 (0.0%)
2364	4																																		4 (0.0%)
2486	4																																		4 (0.0%)
12	3																																		3 (0.0%)
48	3																																		3 (0.0%)
107	3																																		3 (0.0%)
115	3																																		3 (0.0%)
117	3																																		3 (0.0%)
155	3																																		3 (0.0%)
163	3																																		3 (0.0%)
190	3																																		3 (0.0%)
197	3																																		3 (0.0%)
198	3																																		3 (0.0%)
226	3																																		3 (0.0%)
250	3																																		3 (0.0%)
258	3																																		3 (0.0%)
296	3																																		3 (0.0%)
337	3																																		3 (0.0%)
347	3																																		3 (0.0%)
351	3																																		3 (0.0%)
361	3																																		3 (0.0%)
374	3																																		3 (0.0%)
382	3																																		3 (0.0%)
386	3																																		3 (0.0%)
414	3																																		3 (0.0%)
417	3																																		3 (0.0%)
460	3																																		3 (0.0%)
461	3																																		3 (0.0%)
489	3																																		3 (0.0%)
501	3																																		3 (0.0%)
608	3																																		3 (0.0%)
624	3																																		3 (0.0%)
642	3																																		3 (0.0%)
655	3																																		3 (0.0%)
671	3																																		3 (0.0%)
690	3																																		3 (0.0%)
735	3																																		3 (0.0%)
750	3																																		3 (0.0%)
805	3																																		3 (0.0%)
869	3																																		3 (0.0%)
870	3																																		3 (0.0%)
886	3																																		3 (0.0%)
899	3																																		3 (0.0%)
968	3																																		3 (0.0%)
1175	3																																		3 (0.0%)
1202	3																																		3 (0.0%)
1214	3																																		3 (0.0%)
1257	3																																		3 (0.0%)
1262	3																																		3 (0.0%)
1295	3																																		3 (0.0%)
1316	3																																		3 (0.0%)
1391	3																																		3 (0.0%)
1395	3																																		3 (0.0%)
1415	3																																		3 (0.0%)
1478	3																																		3 (0.0%)
1521	3																																		3 (0.0%)
1553	3																																		3 (0.0%)
1589	3																																		3 (0.0%)
1599	3																																		3 (0.0%)
1615	3																																		3 (0.0%)
1622	3																																		3 (0.0%)
1834	3																																		3 (0.0%)
1992	3																																		3 (0.0%)
2086	3																																		3 (0.0%)
2105	3																																		3 (0.0%)
2360	3																																		3 (0.0%)
2362	3																																		3 (0.0%)
2459	3																																		3 (0.0%)
13	2																																		2 (0.0%)
37	2																																		2 (0.0%)
40	2																																		2 (0.0%)
62	2																																		2 (0.0%)
111	2																																		2 (0.0%)
112	2																																		2 (0.0%)
130	2																																		2 (0.0%)
139	2																																		2 (0.0%)
142	2																																		2 (0.0%)
144	2																																		2 (0.0%)
145	2																																		2 (0.0%)
148	2																																		2 (0.0%)
151	2																																		2 (0.0%)
154	2																																		2 (0.0%)
162	2																																		2 (0.0%)
193	2																																		2 (0.0%)
201	2																																		2 (0.0%)
215	2																																		2 (0.0%)
225	2																																		2 (0.0%)
231	2																																		2 (0.0%)
239	2																																		2 (0.0%)
241	2																																		2 (0.0%)
243	2																																		2 (0.0%)
275	2																																		2 (0.0%)
284	2																																		2 (0.0%)
286	2																																		2 (0.0%)
290	2																																		2 (0.0%)
299	2																																		2 (0.0%)
304	2																																		2 (0.0%)
307	2																																		2 (0.0%)
325	2																																		2 (0.0%)
326	2																																		2 (0.0%)
340	2																																		2 (0.0%)
341	2																																		2 (0.0%)
345	2																																		2 (0.0%)
385	2																																		2 (0.0%)
391	2																																		2 (0.0%)
403	2																																		2 (0.0%)
406	2																																		2 (0.0%)
413	2																																		2 (0.0%)
419	2																																		2 (0.0%)
424	2																																		2 (0.0%)
427	2																																		2 (0.0%)
432	2																																		2 (0.0%)
433	2																																		2 (0.0%)
454	2																																		2 (0.0%)
456	2																																		2 (0.0%)
457	2																																		2 (0.0%)
471	2																																		2 (0.0%)
480	2																																		2 (0.0%)
484	2																																		2 (0.0%)
485	2																																		2 (0.0%)
498	2																																		2 (0.0%)
500	2																																		2 (0.0%)
514	2																																		2 (0.0%)
596	2																																		2 (0.0%)
599	2																																		2 (0.0%)
638	2																																		2 (0.0%)
650	2																																		2 (0.0%)
657	2																																		2 (0.0%)
660	2																																		2 (0.0%)
678	2																																		2 (0.0%)
684	2																																		2 (0.0%)
691	2																																		2 (0.0%)
717	2																																		2 (0.0%)
734	2																																		2 (0.0%)
749	2																																		2 (0.0%)
754	2																																		2 (0.0%)
759	2																																		2 (0.0%)
762	2																																		2 (0.0%)
767	2																																		2 (0.0%)
769	2																																		2 (0.0%)
788	2																																		2 (0.0%)
790	2																																		2 (0.0%)
793	2																																		2 (0.0%)
804	2																																		2 (0.0%)
812	2																																		2 (0.0%)
832	2																																		2 (0.0%)
837	2																																		2 (0.0%)
842	2																																		2 (0.0%)
865	2																																		2 (0.0%)
872	2																																		2 (0.0%)
882	2																																		2 (0.0%)
883	2																																		2 (0.0%)
887	2																																		2 (0.0%)
897	2																																		2 (0.0%)
901	2																																		2 (0.0%)
906	2																																		2 (0.0%)
908	2																																		2 (0.0%)
911	2																																		2 (0.0%)
941	2																																		2 (0.0%)
942	2																																		2 (0.0%)
951	2																																		2 (0.0%)
953	2																																		2 (0.0%)
981	2																																		2 (0.0%)
994	2																																		2 (0.0%)
1015	2																																		2 (0.0%)
1056	2																																		2 (0.0%)
1097	2																																		2 (0.0%)
1100	2																																		2 (0.0%)
1104	2																																		2 (0.0%)
1113	2																																		2 (0.0%)
1114	2																																		2 (0.0%)
1119	2																																		2 (0.0%)
1131	2																																		2 (0.0%)
1162	2																																		2 (0.0%)
1170	2																																		2 (0.0%)
1181	2																																		2 (0.0%)
1183	2																																		2 (0.0%)
1184	2																																		2 (0.0%)
1189	2																																		2 (0.0%)
1194	2																																		2 (0.0%)
1212	2																																		2 (0.0%)
1215	2																																		2 (0.0%)
1226	2																																		2 (0.0%)
1245	2																																		2 (0.0%)
1254	2																																		2 (0.0%)
1255	2																																		2 (0.0%)
1259	2																																		2 (0.0%)
1276	2																																		2 (0.0%)
1281	2																																		2 (0.0%)
1287	2																																		2 (0.0%)
1288	2																																		2 (0.0%)
1291	2																																		2 (0.0%)
1332	2																																		2 (0.0%)
1335	2																																		2 (0.0%)
1355	2																																		2 (0.0%)
1364	2																																		2 (0.0%)
1372	2																																		2 (0.0%)
1374	2																																		2 (0.0%)
1399	2																																		2 (0.0%)
1417	2																																		2 (0.0%)
1424	2																																		2 (0.0%)
1437	2																																		2 (0.0%)
1457	2																																		2 (0.0%)
1473	2																																		2 (0.0%)
1474	2																																		2 (0.0%)
1477	2																																		2 (0.0%)
1483	2																																		2 (0.0%)
1526	2																																		2 (0.0%)
1533	2																																		2 (0.0%)
1541	2																																		2 (0.0%)
1543	2																																		2 (0.0%)
1575	2																																		2 (0.0%)
1592	2																																		2 (0.0%)
1624	2																																		2 (0.0%)
1647	2																																		2 (0.0%)
1681	2																																		2 (0.0%)
1686	2																																		2 (0.0%)
1694	2																																		2 (0.0%)
1702	2																																		2 (0.0%)
1709	2																																		2 (0.0%)
1718	2																																		2 (0.0%)
1813	2																																		2 (0.0%)
1835	2																																		2 (0.0%)
1836	2																																		2 (0.0%)
1842	2																																		2 (0.0%)
1892	2																																		2 (0.0%)
1935	2																																		2 (0.0%)
1937	2																																		2 (0.0%)
1942	2																																		2 (0.0%)
1946	2																																		2 (0.0%)
1948	2																																		2 (0.0%)
2059	2																																		2 (0.0%)
2081	2																																		2 (0.0%)
2092	2																																		2 (0.0%)
2099	2																																		2 (0.0%)
2106	2																																		2 (0.0%)
2108	2																																		2 (0.0%)
2134	2																																		2 (0.0%)
2143	2																																		2 (0.0%)
2257	2																																		2 (0.0%)
2264	2																																		2 (0.0%)
2363	2																																		2 (0.0%)
2371	2																																		2 (0.0%)
2475	2																																		2 (0.0%)
2485	2																																		2 (0.0%)
2508	2																																		2 (0.0%)
2541	2																																		2 (0.0%)
2602	2																																		2 (0.0%)
2619	2																																		2 (0.0%)
8	1																																		1 (0.0%)
10	1																																		1 (0.0%)
14	1																																		1 (0.0%)
15	1																																		1 (0.0%)
20	1																																		1 (0.0%)
22	1																																		1 (0.0%)
23	1																																		1 (0.0%)
25	1																																		1 (0.0%)
32	1																																		1 (0.0%)
33	1																																		1 (0.0%)
61	1																																		1 (0.0%)
83	1																																		1 (0.0%)
92	1																		4 (0.0%)																5 (0.0%)
113	1																																		1 (0.0%)
132	1																																		1 (0.0%)
136	1																																		1 (0.0%)
140	1																																		1 (0.0%)
141	1																																		1 (0.0%)
143	1																																		1 (0.0%)
146	1																																		1 (0.0%)
147	1																																		1 (0.0%)
160	1																																		1 (0.0%)
164	1																																		1 (0.0%)
165	1																																		1 (0.0%)
169	1																																		1 (0.0%)
170	1																																		1 (0.0%)
191	1																																		1 (0.0%)
192	1																																		1 (0.0%)
194	1																																		1 (0.0%)
195	1																																		1 (0.0%)
200	1																																		1 (0.0%)
202	1																																		1 (0.0%)
203	1																																		1 (0.0%)
204	1																																		1 (0.0%)
205	1																																		1 (0.0%)
206	1																																		1 (0.0%)
208	1																																		1 (0.0%)
209	1																																		1 (0.0%)
214	1																																		1 (0.0%)
216	1																																		1 (0.0%)
217	1																																		1 (0.0%)
218	1																																		1 (0.0%)
219	1																																		1 (0.0%)
221	1																																		1 (0.0%)
228	1																																		1 (0.0%)
230	1																																		1 (0.0%)
233	1																																		1 (0.0%)
235	1																																		1 (0.0%)
236	1																																		1 (0.0%)
242	1																																		1 (0.0%)
244	1																																		1 (0.0%)
245	1																																		1 (0.0%)
246	1																																		1 (0.0%)
247	1																																		1 (0.0%)
248	1																																		1 (0.0%)
249	1																																		1 (0.0%)
251	1																																		1 (0.0%)
252	1																																		1 (0.0%)
253	1																																		1 (0.0%)
254	1																																		1 (0.0%)
264	1																																		1 (0.0%)
265	1																																		1 (0.0%)
267	1																																		1 (0.0%)
269	1																																		1 (0.0%)
271	1																																		1 (0.0%)
272	1																																		1 (0.0%)
274	1																																		1 (0.0%)
276	1																																		1 (0.0%)
277	1																																		1 (0.0%)
278	1																																		1 (0.0%)
279	1																																		1 (0.0%)
280	1																																		1 (0.0%)
281	1																																		1 (0.0%)
282	1																																		1 (0.0%)
285	1																																		1 (0.0%)
293	1																																		1 (0.0%)
294	1																																		1 (0.0%)
300	1																																		1 (0.0%)
302	1																																		1 (0.0%)
305	1																																		1 (0.0%)
306	1																																		1 (0.0%)
318	1																																		1 (0.0%)
319	1																																		1 (0.0%)
320	1																																		1 (0.0%)
321	1																																		1 (0.0%)
323	1																																		1 (0.0%)
324	1																																		1 (0.0%)
327	1																																		1 (0.0%)
328	1																																		1 (0.0%)
329	1																																		1 (0.0%)
330	1																																		1 (0.0%)
331	1																																		1 (0.0%)
332	1																																		1 (0.0%)
335	1																																		1 (0.0%)
336	1																																		1 (0.0%)
338	1																																		1 (0.0%)
339	1																																		1 (0.0%)
342	1																																		1 (0.0%)
343	1																																		1 (0.0%)
344	1																																		1 (0.0%)
346	1																																		1 (0.0%)
349	1																																		1 (0.0%)
350	1																																		1 (0.0%)
353	1																																		1 (0.0%)
359	1																																		1 (0.0%)
362	1																																		1 (0.0%)
363	1																																		1 (0.0%)
368	1																																		1 (0.0%)
370	1																																		1 (0.0%)
371	1																																		1 (0.0%)
373	1																																		1 (0.0%)
375	1																																		1 (0.0%)
383	1																																		1 (0.0%)
394	1																																		1 (0.0%)
395	1																																		1 (0.0%)
397	1																																		1 (0.0%)
398	1																																		1 (0.0%)
400	1																																		1 (0.0%)
401	1																																		1 (0.0%)
402	1																																		1 (0.0%)
405	1																																		1 (0.0%)
408	1																																		1 (0.0%)
409	1																																		1 (0.0%)
410	1																																		1 (0.0%)
411	1																																		1 (0.0%)
412	1																																		1 (0.0%)
415	1																																		1 (0.0%)
418	1																																		1 (0.0%)
420	1																																		1 (0.0%)
422	1																																		1 (0.0%)
423	1																																		1 (0.0%)
425	1																																		1 (0.0%)
426	1																																		1 (0.0%)
429	1																																		1 (0.0%)
430	1																																		1 (0.0%)
434	1																																		1 (0.0%)
435	1																																		1 (0.0%)
436	1																																		1 (0.0%)
458	1																																		1 (0.0%)
459	1																																		1 (0.0%)
463	1																																		1 (0.0%)
465	1																																		1 (0.0%)
467	1																																		1 (0.0%)
470	1																																		1 (0.0%)
472	1																																		1 (0.0%)
474	1																																		1 (0.0%)
475	1																																		1 (0.0%)
481	1																																		1 (0.0%)
482	1																																		1 (0.0%)
483	1																																		1 (0.0%)
486	1																																		1 (0.0%)
487	1																																		1 (0.0%)
490	1																																		1 (0.0%)
491	1																																		1 (0.0%)
492	1																																		1 (0.0%)
493	1																																		1 (0.0%)
495	1																																		1 (0.0%)
496	1																																		1 (0.0%)
497	1																																		1 (0.0%)
499	1																																		1 (0.0%)
505	1																																		1 (0.0%)
507	1																																		1 (0.0%)
508	1																																		1 (0.0%)
509	1																																		1 (0.0%)
510	1																																		1 (0.0%)
511	1																																		1 (0.0%)
512	1																																		1 (0.0%)
513	1																																		1 (0.0%)
517	1																																		1 (0.0%)
518	1																																		1 (0.0%)
519	1																																		1 (0.0%)
520	1																																		1 (0.0%)
522	1																																		1 (0.0%)
523	1																																		1 (0.0%)
524	1																																		1 (0.0%)
525	1																																		1 (0.0%)
577	1																																		1 (0.0%)
578	1																																		1 (0.0%)
582	1																																		1 (0.0%)
584	1																																		1 (0.0%)
586	1																																		1 (0.0%)
588	1																																		1 (0.0%)
589	1																																		1 (0.0%)
591	1																																		1 (0.0%)
593	1																																		1 (0.0%)
594	1																																		1 (0.0%)
595	1																																		1 (0.0%)
597	1																																		1 (0.0%)
598	1																																		1 (0.0%)
600	1																																		1 (0.0%)
601	1																																		1 (0.0%)
602	1																																		1 (0.0%)
603	1																																		1 (0.0%)
604	1																																		1 (0.0%)
605	1																																		1 (0.0%)
606	1																																		1 (0.0%)
607	1																																		1 (0.0%)
609	1																																		1 (0.0%)
610	1																																		1 (0.0%)
611	1																																		1 (0.0%)
612	1																																		1 (0.0%)
613	1																																		1 (0.0%)
614	1																																		1 (0.0%)
615	1																																		1 (0.0%)
616	1																																		1 (0.0%)
619	1																																		1 (0.0%)
620	1																																		1 (0.0%)
621	1																																		1 (0.0%)
622	1																																		1 (0.0%)
623	1																																		1 (0.0%)
626	1																																		1 (0.0%)
627	1																																		1 (0.0%)
629	1																																		1 (0.0%)
630	1																																		1 (0.0%)
633	1																																		1 (0.0%)
639	1																																		1 (0.0%)
640	1																																		1 (0.0%)
651	1																																		1 (0.0%)
652	1																																		1 (0.0%)
653	1																																		1 (0.0%)
656	1																																		1 (0.0%)
658	1																																		1 (0.0%)
659	1																																		1 (0.0%)
662	1																																		1 (0.0%)
663	1																																		1 (0.0%)
664	1																																		1 (0.0%)
665	1																																		1 (0.0%)
668	1																																		1 (0.0%)
669	1																																		1 (0.0%)
670	1																																		1 (0.0%)
672	1																																		1 (0.0%)
673	1																																		1 (0.0%)
675	1																																		1 (0.0%)
676	1																																		1 (0.0%)
677	1																																		1 (0.0%)
679	1																																		1 (0.0%)
680	1																																		1 (0.0%)
681	1																																		1 (0.0%)
682	1																																		1 (0.0%)
683	1																																		1 (0.0%)
689	1																																		1 (0.0%)
693	1																																		1 (0.0%)
695	1																																		1 (0.0%)
696	1																																		1 (0.0%)
697	1																																		1 (0.0%)
698	1																																		1 (0.0%)
710	1																																		1 (0.0%)
714	1																																		1 (0.0%)
715	1																																		1 (0.0%)
716	1																																		1 (0.0%)
736	1																																		1 (0.0%)
737	1																																		1 (0.0%)
738	1																																		1 (0.0%)
740	1																																		1 (0.0%)
741	1																																		1 (0.0%)
742	1																																		1 (0.0%)
743	1																																		1 (0.0%)
744	1																																		1 (0.0%)
745	1																																		1 (0.0%)
746	1																																		1 (0.0%)
747	1																																		1 (0.0%)
748	1																																		1 (0.0%)
751	1																																		1 (0.0%)
752	1																																		1 (0.0%)
753	1																																		1 (0.0%)
755	1																																		1 (0.0%)
756	1																																		1 (0.0%)
757	1																																		1 (0.0%)
758	1																																		1 (0.0%)
760	1																																		1 (0.0%)
761	1																																		1 (0.0%)
763	1																																		1 (0.0%)
765	1																																		1 (0.0%)
766	1																																		1 (0.0%)
770	1																																		1 (0.0%)
771	1																																		1 (0.0%)
772	1																																		1 (0.0%)
773	1																																		1 (0.0%)
775	1																																		1 (0.0%)
776	1																																		1 (0.0%)
777	1																																		1 (0.0%)
779	1																																		1 (0.0%)
780	1																																		1 (0.0%)
783	1																																		1 (0.0%)
784	1																																		1 (0.0%)
785	1																																		1 (0.0%)
786	1																																		1 (0.0%)
789	1																																		1 (0.0%)
791	1																																		1 (0.0%)
792	1																																		1 (0.0%)
795	1																																		1 (0.0%)
797	1																																		1 (0.0%)
799	1																																		1 (0.0%)
800	1																																		1 (0.0%)
802	1																																		1 (0.0%)
803	1																																		1 (0.0%)
806	1																																		1 (0.0%)
807	1																																		1 (0.0%)
808	1																																		1 (0.0%)
809	1																																		1 (0.0%)
810	1																																		1 (0.0%)
811	1																																		1 (0.0%)
813	1																																		1 (0.0%)
814	1																																		1 (0.0%)
815	1																																		1 (0.0%)
817	1																																		1 (0.0%)
818	1																																		1 (0.0%)
819	1																																		1 (0.0%)
820	1																																		1 (0.0%)
821	1																																		1 (0.0%)
822	1																																		1 (0.0%)
823	1																																		1 (0.0%)
824	1																																		1 (0.0%)
825	1																																		1 (0.0%)
826	1																																		1 (0.0%)
827	1																																		1 (0.0%)
829	1																																		1 (0.0%)
830	1																																		1 (0.0%)
831	1																																		1 (0.0%)
833	1																																		1 (0.0%)
834	1																																		1 (0.0%)
835	1																																		1 (0.0%)
836	1																																		1 (0.0%)
840	1																																		1 (0.0%)
841	1																																		1 (0.0%)
843	1																																		1 (0.0%)
844	1																																		1 (0.0%)
848	1																																		1 (0.0%)
850	1																																		1 (0.0%)
851	1																																		1 (0.0%)
853	1																																		1 (0.0%)
854	1																																		1 (0.0%)
857	1																																		1 (0.0%)
863	1																																		1 (0.0%)
864	1																																		1 (0.0%)
866	1																																		1 (0.0%)
867	1																																		1 (0.0%)
868	1																																		1 (0.0%)
871	1																																		1 (0.0%)
874	1																																		1 (0.0%)
875	1																																		1 (0.0%)
876	1																																		1 (0.0%)
877	1																																		1 (0.0%)
878	1																																		1 (0.0%)
879	1																																		1 (0.0%)
880	1																																		1 (0.0%)
881	1																																		1 (0.0%)
884	1																																		1 (0.0%)
885	1																																		1 (0.0%)
888	1																																		1 (0.0%)
889	1																																		1 (0.0%)
890	1																																		1 (0.0%)
891	1																																		1 (0.0%)
894	1																																		1 (0.0%)
895	1																																		1 (0.0%)
896	1																																		1 (0.0%)
898	1																																		1 (0.0%)
900	1																																		1 (0.0%)
902	1																																		1 (0.0%)
904	1																																		1 (0.0%)
905	1																																		1 (0.0%)
907	1																																		1 (0.0%)
909	1																																		1 (0.0%)
912	1																																		1 (0.0%)
913	1																																		1 (0.0%)
914	1																																		1 (0.0%)
927	1																																		1 (0.0%)
928	1																																		1 (0.0%)
931	1																																		1 (0.0%)
932	1																																		1 (0.0%)
933	1																																		1 (0.0%)
939	1																																		1 (0.0%)
940	1																																		1 (0.0%)
945	1																																		1 (0.0%)
947	1																																		1 (0.0%)
948	1																																		1 (0.0%)
949	1																																		1 (0.0%)
950	1																																		1 (0.0%)
952	1																																		1 (0.0%)
954	1																																		1 (0.0%)
960	1																		13 (0.0%)																14 (0.0%)
961	1																																		1 (0.0%)
963	1																																		1 (0.0%)
973	1																																		1 (0.0%)
978	1																																		1 (0.0%)
983	1																																		1 (0.0%)
988	1																																		1 (0.0%)
991	1																																		1 (0.0%)
992	1																																		1 (0.0%)
1008	1																																		1 (0.0%)
1009	1																																		1 (0.0%)
1013	1																																		1 (0.0%)
1020	1																		3 (0.0%)																4 (0.0%)
1078	1																		3 (0.0%)																4 (0.0%)
1089	1																																		1 (0.0%)
1090	1																																		1 (0.0%)
1095	1																																		1 (0.0%)
1096	1																																		1 (0.0%)
1099	1																																		1 (0.0%)
1109	1																																		1 (0.0%)
1110	1																																		1 (0.0%)
1115	1																																		1 (0.0%)
1117	1																																		1 (0.0%)
1118	1																																		1 (0.0%)
1121	1																																		1 (0.0%)
1123	1																																		1 (0.0%)
1124	1																																		1 (0.0%)
1125	1																																		1 (0.0%)
1130	1																																		1 (0.0%)
1139	1																																		1 (0.0%)
1153	1																																		1 (0.0%)
1154	1																																		1 (0.0%)
1156	1																																		1 (0.0%)
1157	1																																		1 (0.0%)
1158	1																																		1 (0.0%)
1159	1																																		1 (0.0%)
1160	1																																		1 (0.0%)
1161	1																																		1 (0.0%)
1163	1																																		1 (0.0%)
1164	1																																		1 (0.0%)
1165	1																																		1 (0.0%)
1166	1																																		1 (0.0%)
1167	1																																		1 (0.0%)
1168	1																																		1 (0.0%)
1169	1																																		1 (0.0%)
1171	1																																		1 (0.0%)
1172	1																																		1 (0.0%)
1173	1																																		1 (0.0%)
1174	1																																		1 (0.0%)
1176	1																																		1 (0.0%)
1178	1																																		1 (0.0%)
1179	1																																		1 (0.0%)
1180	1																																		1 (0.0%)
1182	1																																		1 (0.0%)
1185	1																																		1 (0.0%)
1186	1																																		1 (0.0%)
1187	1																																		1 (0.0%)
1188	1																							2 (0.0%)											3 (0.0%)
1190	1																																		1 (0.0%)
1193	1																																		1 (0.0%)
1196	1																																		1 (0.0%)
1201	1																																		1 (0.0%)
1203	1																																		1 (0.0%)
1204	1																																		1 (0.0%)
1206	1																																		1 (0.0%)
1208	1																																		1 (0.0%)
1210	1																																		1 (0.0%)
1211	1																																		1 (0.0%)
1221	1																																		1 (0.0%)
1223	1																																		1 (0.0%)
1246	1																																		1 (0.0%)
1256	1																																		1 (0.0%)
1258	1																																		1 (0.0%)
1260	1																																		1 (0.0%)
1261	1																																		1 (0.0%)
1263	1																																		1 (0.0%)
1264	1																																		1 (0.0%)
1265	1																																		1 (0.0%)
1275	1																																		1 (0.0%)
1282	1																																		1 (0.0%)
1283	1																																		1 (0.0%)
1284	1																																		1 (0.0%)
1285	1																																		1 (0.0%)
1286	1																																		1 (0.0%)
1289	1																																		1 (0.0%)
1290	1																																		1 (0.0%)
1292	1																																		1 (0.0%)
1294	1																																		1 (0.0%)
1296	1																																		1 (0.0%)
1310	1																																		1 (0.0%)
1311	1																																		1 (0.0%)
1312	1																																		1 (0.0%)
1313	1																																		1 (0.0%)
1318	1																																		1 (0.0%)
1321	1																																		1 (0.0%)
1323	1																																		1 (0.0%)
1325	1																																		1 (0.0%)
1326	1																																		1 (0.0%)
1327	1																																		1 (0.0%)
1330	1																																		1 (0.0%)
1336	1																																		1 (0.0%)
1337	1																																		1 (0.0%)
1340	1																																		1 (0.0%)
1344	1																																		1 (0.0%)
1345	1																																		1 (0.0%)
1347	1																																		1 (0.0%)
1357	1																																		1 (0.0%)
1358	1																																		1 (0.0%)
1359	1																																		1 (0.0%)
1360	1																																		1 (0.0%)
1361	1																																		1 (0.0%)
1373	1																																		1 (0.0%)
1375	1																																		1 (0.0%)
1376	1																																		1 (0.0%)
1377	1																																		1 (0.0%)
1380	1																																		1 (0.0%)
1382	1																																		1 (0.0%)
1385	1																																		1 (0.0%)
1386	1																																		1 (0.0%)
1389	1																																		1 (0.0%)
1392	1																																		1 (0.0%)
1393	1																																		1 (0.0%)
1394	1																																		1 (0.0%)
1398	1																																		1 (0.0%)
1400	1																																		1 (0.0%)
1404	1																																		1 (0.0%)
1405	1																																		1 (0.0%)
1406	1																																		1 (0.0%)
1410	1																																		1 (0.0%)
1412	1																																		1 (0.0%)
1413	1																																		1 (0.0%)
1419	1																																		1 (0.0%)
1422	1																																		1 (0.0%)
1426	1																																		1 (0.0%)
1428	1																																		1 (0.0%)
1430	1																																		1 (0.0%)
1431	1																																		1 (0.0%)
1432	1																																		1 (0.0%)
1433	1																																		1 (0.0%)
1434	1																																		1 (0.0%)
1438	1																																		1 (0.0%)
1439	1																																		1 (0.0%)
1440	1																																		1 (0.0%)
1441	1																																		1 (0.0%)
1442	1																																		1 (0.0%)
1446	1																																		1 (0.0%)
1447	1																																		1 (0.0%)
1450	1																																		1 (0.0%)
1453	1																																		1 (0.0%)
1458	1																																		1 (0.0%)
1459	1																																		1 (0.0%)
1463	1																																		1 (0.0%)
1464	1																																		1 (0.0%)
1465	1																																		1 (0.0%)
1466	1																																		1 (0.0%)
1467	1																																		1 (0.0%)
1468	1																																		1 (0.0%)
1475	1																																		1 (0.0%)
1476	1																																		1 (0.0%)
1479	1																																		1 (0.0%)
1480	1																																		1 (0.0%)
1481	1																																		1 (0.0%)
1482	1																																		1 (0.0%)
1484	1																																		1 (0.0%)
1485	1																																		1 (0.0%)
1514	1																																		1 (0.0%)
1522	1																																		1 (0.0%)
1523	1																																		1 (0.0%)
1527	1																																		1 (0.0%)
1529	1																																		1 (0.0%)
1530	1																																		1 (0.0%)
1531	1																																		1 (0.0%)
1534	1																																		1 (0.0%)
1535	1																																		1 (0.0%)
1536	1																																		1 (0.0%)
1537	1																																		1 (0.0%)
1539	1																																		1 (0.0%)
1540	1																																		1 (0.0%)
1542	1																																		1 (0.0%)
1552	1																																		1 (0.0%)
1557	1																																		1 (0.0%)
1558	1																																		1 (0.0%)
1561	1																																		1 (0.0%)
1568	1																																		1 (0.0%)
1571	1																																		1 (0.0%)
1572	1																																		1 (0.0%)
1573	1																																		1 (0.0%)
1574	1																																		1 (0.0%)
1576	1																																		1 (0.0%)
1578	1																																		1 (0.0%)
1581	1																																		1 (0.0%)
1582	1																																		1 (0.0%)
1584	1																																		1 (0.0%)
1586	1																																		1 (0.0%)
1587	1																																		1 (0.0%)
1590	1																																		1 (0.0%)
1593	1																																		1 (0.0%)
1594	1																																		1 (0.0%)
1595	1																																		1 (0.0%)
1598	1																																		1 (0.0%)
1600	1																																		1 (0.0%)
1601	1																																		1 (0.0%)
1602	1																																		1 (0.0%)
1603	1																																		1 (0.0%)
1604	1																																		1 (0.0%)
1605	1																																		1 (0.0%)
1606	1																																		1 (0.0%)
1607	1																																		1 (0.0%)
1608	1																																		1 (0.0%)
1609	1																																		1 (0.0%)
1610	1																																		1 (0.0%)
1612	1																																		1 (0.0%)
1613	1																																		1 (0.0%)
1614	1																																		1 (0.0%)
1616	1																																		1 (0.0%)
1617	1																																		1 (0.0%)
1618	1																																		1 (0.0%)
1619	1																																		1 (0.0%)
1620	1																																		1 (0.0%)
1621	1																																		1 (0.0%)
1623	1																																		1 (0.0%)
1625	1																																		1 (0.0%)
1626	1																																		1 (0.0%)
1627	1																																		1 (0.0%)
1628	1																																		1 (0.0%)
1630	1																																		1 (0.0%)
1633	1																																		1 (0.0%)
1634	1																																		1 (0.0%)
1635	1																																		1 (0.0%)
1636	1																																		1 (0.0%)
1638	1																																		1 (0.0%)
1639	1																																		1 (0.0%)
1640	1																																		1 (0.0%)
1641	1																																		1 (0.0%)
1642	1																																		1 (0.0%)
1643	1																																		1 (0.0%)
1644	1																																		1 (0.0%)
1645	1																																		1 (0.0%)
1646	1																																		1 (0.0%)
1649	1																																		1 (0.0%)
1650	1																																		1 (0.0%)
1655	1																																		1 (0.0%)
1656	1																																		1 (0.0%)
1657	1																																		1 (0.0%)
1679	1																																		1 (0.0%)
1684	1																																		1 (0.0%)
1685	1																																		1 (0.0%)
1687	1																																		1 (0.0%)
1688	1																																		1 (0.0%)
1689	1																																		1 (0.0%)
1690	1																																		1 (0.0%)
1692	1																																		1 (0.0%)
1697	1																																		1 (0.0%)
1698	1																																		1 (0.0%)
1699	1																																		1 (0.0%)
1700	1																																		1 (0.0%)
1701	1																																		1 (0.0%)
1704	1																																		1 (0.0%)
1705	1																																		1 (0.0%)
1714	1																																		1 (0.0%)
1716	1																																		1 (0.0%)
1717	1																																		1 (0.0%)
1719	1																																		1 (0.0%)
1720	1																																		1 (0.0%)
1721	1																																		1 (0.0%)
1722	1																																		1 (0.0%)
1723	1																																		1 (0.0%)
1724	1																																		1 (0.0%)
1725	1																																		1 (0.0%)
1726	1																																		1 (0.0%)
1727	1																																		1 (0.0%)
1729	1																																		1 (0.0%)
1763	1																																		1 (0.0%)
1778	1																																		1 (0.0%)
1781	1																																		1 (0.0%)
1782	1																																		1 (0.0%)
1783	1																																		1 (0.0%)
1784	1																																		1 (0.0%)
1785	1																																		1 (0.0%)
1786	1																																		1 (0.0%)
1788	1																																		1 (0.0%)
1796	1																																		1 (0.0%)
1807	1																																		1 (0.0%)
1811	1																																		1 (0.0%)
1822	1																																		1 (0.0%)
1825	1																																		1 (0.0%)
1833	1																																		1 (0.0%)
1837	1																																		1 (0.0%)
1838	1																																		1 (0.0%)
1839	1																																		1 (0.0%)
1840	1																																		1 (0.0%)
1841	1																																		1 (0.0%)
1843	1																																		1 (0.0%)
1844	1																																		1 (0.0%)
1845	1																																		1 (0.0%)
1846	1																																		1 (0.0%)
1848	1																																		1 (0.0%)
1849	1																																		1 (0.0%)
1850	1																																		1 (0.0%)
1858	1																																		1 (0.0%)
1859	1																																		1 (0.0%)
1861	1																																		1 (0.0%)
1874	1																																		1 (0.0%)
1875	1																																		1 (0.0%)
1885	1																																		1 (0.0%)
1889	1																																		1 (0.0%)
1930	1																																		1 (0.0%)
1931	1																																		1 (0.0%)
1932	1																																		1 (0.0%)
1933	1																																		1 (0.0%)
1934	1																																		1 (0.0%)
1939	1																																		1 (0.0%)
1940	1																																		1 (0.0%)
1941	1																																		1 (0.0%)
1943	1																																		1 (0.0%)
1945	1																																		1 (0.0%)
1947	1																																		1 (0.0%)
1960	1																																		1 (0.0%)
1979	1																																		1 (0.0%)
1986	1																																		1 (0.0%)
2004	1																																		1 (0.0%)
2008	1																																		1 (0.0%)
2009	1																																		1 (0.0%)
2023	1																																		1 (0.0%)
2025	1																																		1 (0.0%)
2026	1																																		1 (0.0%)
2027	1																																		1 (0.0%)
2028	1																																		1 (0.0%)
2030	1																																		1 (0.0%)
2044	1																																		1 (0.0%)
2045	1																																		1 (0.0%)
2046	1																																		1 (0.0%)
2058	1																																		1 (0.0%)
2060	1																																		1 (0.0%)
2063	1																																		1 (0.0%)
2064	1																																		1 (0.0%)
2066	1																																		1 (0.0%)
2068	1																																		1 (0.0%)
2069	1																																		1 (0.0%)
2071	1																																		1 (0.0%)
2072	1																																		1 (0.0%)
2082	1																																		1 (0.0%)
2083	1																																		1 (0.0%)
2084	1																																		1 (0.0%)
2085	1																																		1 (0.0%)
2087	1																																		1 (0.0%)
2088	1																																		1 (0.0%)
2089	1																																		1 (0.0%)
2090	1																																		1 (0.0%)
2091	1																																		1 (0.0%)
2093	1																																		1 (0.0%)
2094	1																																		1 (0.0%)
2095	1																																		1 (0.0%)
2096	1																																		1 (0.0%)
2097	1																																		1 (0.0%)
2098	1																																		1 (0.0%)
2100	1																																		1 (0.0%)
2101	1																																		1 (0.0%)
2103	1																																		1 (0.0%)
2104	1																																		1 (0.0%)
2110	1																																		1 (0.0%)
2111	1																																		1 (0.0%)
2113	1																																		1 (0.0%)
2115	1																																		1 (0.0%)
2120	1																																		1 (0.0%)
2122	1																																		1 (0.0%)
2127	1																																		1 (0.0%)
2128	1																																		1 (0.0%)
2130	1																																		1 (0.0%)
2131	1																																		1 (0.0%)
2132	1																																		1 (0.0%)
2136	1																																		1 (0.0%)
2137	1																																		1 (0.0%)
2138	1																																		1 (0.0%)
2144	1																																		1 (0.0%)
2145	1																																		1 (0.0%)
2148	1																																		1 (0.0%)
2149	1																																		1 (0.0%)
2170	1																																		1 (0.0%)
2172	1																																		1 (0.0%)
2188	1																																		1 (0.0%)
2189	1																																		1 (0.0%)
2256	1																																		1 (0.0%)
2265	1																																		1 (0.0%)
2284	1																																		1 (0.0%)
2310	1																																		1 (0.0%)
2318	1																																		1 (0.0%)
2342	1																																		1 (0.0%)
2357	1																																		1 (0.0%)
2361	1																																		1 (0.0%)
2365	1																																		1 (0.0%)
2366	1																																		1 (0.0%)
2367	1																																		1 (0.0%)
2368	1																																		1 (0.0%)
2369	1																																		1 (0.0%)
2370	1																																		1 (0.0%)
2372	1																																		1 (0.0%)
2373	1																																		1 (0.0%)
2374	1																																		1 (0.0%)
2375	1																																		1 (0.0%)
2377	1																																		1 (0.0%)
2383	1																																		1 (0.0%)
2455	1																																		1 (0.0%)
2456	1																																		1 (0.0%)
2457	1																																		1 (0.0%)
2458	1																																		1 (0.0%)
2460	1																																		1 (0.0%)
2461	1																																		1 (0.0%)
2462	1																																		1 (0.0%)
2465	1																																		1 (0.0%)
2467	1																																		1 (0.0%)
2470	1																																		1 (0.0%)
2471	1																																		1 (0.0%)
2472	1																																		1 (0.0%)
2473	1																																		1 (0.0%)
2476	1																																		1 (0.0%)
2477	1																																		1 (0.0%)
2478	1																																		1 (0.0%)
2480	1																																		1 (0.0%)
2481	1																																		1 (0.0%)
2482	1																																		1 (0.0%)
2483	1																																		1 (0.0%)
2484	1																																		1 (0.0%)
2487	1																																		1 (0.0%)
2488	1																																		1 (0.0%)
2490	1																																		1 (0.0%)
2493	1																																		1 (0.0%)
2495	1																																		1 (0.0%)
2499	1																																		1 (0.0%)
2500	1																																		1 (0.0%)
2501	1																																		1 (0.0%)
2502	1																																		1 (0.0%)
2505	1																																		1 (0.0%)
2506	1																																		1 (0.0%)
2507	1																																		1 (0.0%)
2516	1																																		1 (0.0%)
2533	1																																		1 (0.0%)
2534	1																																		1 (0.0%)
2535	1																																		1 (0.0%)
2536	1																																		1 (0.0%)
2537	1																																		1 (0.0%)
2538	1																																		1 (0.0%)
2539	1																																		1 (0.0%)
2540	1																																		1 (0.0%)
2577	1																																		1 (0.0%)
2610	1																																		1 (0.0%)
3																			231 (0.5%)																231 (0.5%)
45																					1 (0.0%)														1 (0.0%)
46																			3 (0.0%)																3 (0.0%)
47																			7 (0.0%)																7 (0.0%)
65																								2 (0.0%)											2 (0.0%)
66										1 (0.0%)																									1 (0.0%)
67																												3 (0.0%)							3 (0.0%)
68																												1 (0.0%)							1 (0.0%)
69																					1 (0.0%)														1 (0.0%)
70																					2 (0.0%)														2 (0.0%)
71				1 (0.0%)																															1 (0.0%)
72							1 (0.0%)																												1 (0.0%)
73																					1 (0.0%)														1 (0.0%)
74																					1 (0.0%)														1 (0.0%)
75																												1 (0.0%)							1 (0.0%)
76										1 (0.0%)																									1 (0.0%)
77										1 (0.0%)																									1 (0.0%)
78																							1 (0.0%)												1 (0.0%)
79																								1 (0.0%)											1 (0.0%)
80																											1 (0.0%)								1 (0.0%)
81																					1 (0.0%)														1 (0.0%)
82																					1 (0.0%)														1 (0.0%)
84																												2 (0.0%)							2 (0.0%)
85																												1 (0.0%)							1 (0.0%)
88																							1 (0.0%)												1 (0.0%)
89																					2 (0.0%)														2 (0.0%)
90																												2 (0.0%)							2 (0.0%)
93																			1 (0.0%)																1 (0.0%)
94																			1 (0.0%)																1 (0.0%)
95																			11 (0.0%)																11 (0.0%)
96																			6 (0.0%)																6 (0.0%)
97																			1 (0.0%)																1 (0.0%)
98																			1 (0.0%)																1 (0.0%)
99																			1 (0.0%)																1 (0.0%)
100																			1 (0.0%)																1 (0.0%)
101																			8 (0.0%)					1 (0.0%)											9 (0.0%)
102																												2 (0.0%)							2 (0.0%)
104																												1 (0.0%)							1 (0.0%)
105										2 (0.0%)																									2 (0.0%)
106				1 (0.0%)																															1 (0.0%)
108																												1 (0.0%)							1 (0.0%)
109																							1 (0.0%)												1 (0.0%)
120										1 (0.0%)																									1 (0.0%)
129							15 (0.0%)																												15 (0.0%)
156																			1 (0.0%)																1 (0.0%)
158																												2 (0.0%)							2 (0.0%)
173								4 (0.0%)																											4 (0.0%)
174							1 (0.0%)																												1 (0.0%)
175						2 (0.0%)																													2 (0.0%)
176																								1 (0.0%)											1 (0.0%)
177								7 (0.0%)																											7 (0.0%)
178																								5 (0.0%)											5 (0.0%)
179																														1 (0.0%)					1 (0.0%)
180																														13 (0.0%)					13 (0.0%)
181																								2 (0.0%)											2 (0.0%)
182																					1 (0.0%)														1 (0.0%)
184										1 (0.0%)																									1 (0.0%)
185																								1 (0.0%)											1 (0.0%)
186																								2 (0.0%)											2 (0.0%)
188																												1 (0.0%)							1 (0.0%)
211																					1 (0.0%)														1 (0.0%)
261				1 (0.0%)																															1 (0.0%)
262				1 (0.0%)																															1 (0.0%)
392																			7 (0.0%)																7 (0.0%)
393																			1 (0.0%)																1 (0.0%)
450																												2 (0.0%)							2 (0.0%)
451																					1 (0.0%)														1 (0.0%)
479																			21 (0.0%)																21 (0.0%)
692																								1 (0.0%)											1 (0.0%)
694																								1 (0.0%)											1 (0.0%)
699																			23 (0.0%)																23 (0.0%)
700																			2 (0.0%)																2 (0.0%)
712																			5 (0.0%)																5 (0.0%)
713																			2 (0.0%)																2 (0.0%)
727																			2 (0.0%)																2 (0.0%)
739																					1 (0.0%)														1 (0.0%)
794																					1 (0.0%)														1 (0.0%)
838																								1 (0.0%)											1 (0.0%)
855																			1 (0.0%)																1 (0.0%)
858																			3 (0.0%)																3 (0.0%)
929																												1 (0.0%)							1 (0.0%)
930																			1 (0.0%)																1 (0.0%)
946																			1 (0.0%)																1 (0.0%)
959																			1 (0.0%)																1 (0.0%)
962																			1 (0.0%)																1 (0.0%)
965																			1 (0.0%)																1 (0.0%)
966																			1 (0.0%)																1 (0.0%)
967																												1 (0.0%)							1 (0.0%)
969																			1 (0.0%)																1 (0.0%)
970																			1 (0.0%)																1 (0.0%)
971																			5 (0.0%)																5 (0.0%)
972						1 (0.0%)																													1 (0.0%)
974																			1 (0.0%)																1 (0.0%)
975																			7 (0.0%)																7 (0.0%)
976																												1 (0.0%)							1 (0.0%)
977																												3 (0.0%)							3 (0.0%)
982																												1 (0.0%)							1 (0.0%)
984																												1 (0.0%)							1 (0.0%)
987																												1 (0.0%)							1 (0.0%)
996																			1 (0.0%)																1 (0.0%)
997																			4 (0.0%)																4 (0.0%)
998																			2 (0.0%)																2 (0.0%)
999																			11 (0.0%)																11 (0.0%)
1000																			1 (0.0%)																1 (0.0%)
1001																			1 (0.0%)																1 (0.0%)
1002																			5 (0.0%)																5 (0.0%)
1003																			1 (0.0%)																1 (0.0%)
1004																			1 (0.0%)																1 (0.0%)
1005																			2 (0.0%)																2 (0.0%)
1010																			6 (0.0%)																6 (0.0%)
1011																			1 (0.0%)																1 (0.0%)
1016																			1 (0.0%)																1 (0.0%)
1033																			10 (0.0%)																10 (0.0%)
1039																			9 (0.0%)																9 (0.0%)
1076																			8 (0.0%)																8 (0.0%)
1077																			1 (0.0%)																1 (0.0%)
1079																			1 (0.0%)																1 (0.0%)
1080																			2 (0.0%)																2 (0.0%)
1081																			1 (0.0%)																1 (0.0%)
1082																			1 (0.0%)																1 (0.0%)
1083																			1 (0.0%)																1 (0.0%)
1084																			1 (0.0%)																1 (0.0%)
1085																			1 (0.0%)																1 (0.0%)
1086																			1 (0.0%)																1 (0.0%)
1087																			2 (0.0%)																2 (0.0%)
1088																			2 (0.0%)																2 (0.0%)
1105																			1 (0.0%)																1 (0.0%)
1106																			2 (0.0%)																2 (0.0%)
1107																			2 (0.0%)																2 (0.0%)
1108																			1 (0.0%)																1 (0.0%)
1111																			1 (0.0%)																1 (0.0%)
1112																			1 (0.0%)																1 (0.0%)
1116																			1 (0.0%)																1 (0.0%)
1120																			1 (0.0%)																1 (0.0%)
1122																			1 (0.0%)																1 (0.0%)
1126																			1 (0.0%)																1 (0.0%)
1127										3 (0.0%)																									3 (0.0%)
1128																			1 (0.0%)																1 (0.0%)
1132																			1 (0.0%)																1 (0.0%)
1134																			1 (0.0%)																1 (0.0%)
1135																			1 (0.0%)																1 (0.0%)
1136																			1 (0.0%)																1 (0.0%)
1137																			1 (0.0%)																1 (0.0%)
1138																												1 (0.0%)							1 (0.0%)
1140																			1 (0.0%)																1 (0.0%)
1141																			2 (0.0%)																2 (0.0%)
1142										3 (0.0%)																									3 (0.0%)
1143																			6 (0.0%)																6 (0.0%)
1144							2 (0.0%)																												2 (0.0%)
1152																			1 (0.0%)																1 (0.0%)
1192																			4 (0.0%)																4 (0.0%)
1195																			1 (0.0%)																1 (0.0%)
1197																			1 (0.0%)																1 (0.0%)
1198																			2 (0.0%)																2 (0.0%)
1199																			1 (0.0%)																1 (0.0%)
1200																			1 (0.0%)																1 (0.0%)
1205																			2 (0.0%)																2 (0.0%)
1207																			1 (0.0%)																1 (0.0%)
1213																			2 (0.0%)																2 (0.0%)
1216																			1 (0.0%)																1 (0.0%)
1217																			1 (0.0%)																1 (0.0%)
1218																			1 (0.0%)																1 (0.0%)
1219																			1 (0.0%)																1 (0.0%)
1220																			1 (0.0%)																1 (0.0%)
1222																			1 (0.0%)																1 (0.0%)
1224																								5 (0.0%)											5 (0.0%)
1225																												1 (0.0%)							1 (0.0%)
1227																			1 (0.0%)																1 (0.0%)
1231																			1 (0.0%)																1 (0.0%)
1234																			1 (0.0%)																1 (0.0%)
1247																														1 (0.0%)					1 (0.0%)
1248																														2 (0.0%)					2 (0.0%)
1250								2 (0.0%)																											2 (0.0%)
1251							1 (0.0%)																												1 (0.0%)
1252																														1 (0.0%)					1 (0.0%)
1253																														1 (0.0%)					1 (0.0%)
1315																			1 (0.0%)																1 (0.0%)
1317																			1 (0.0%)																1 (0.0%)
1319																			1 (0.0%)																1 (0.0%)
1320																			1 (0.0%)																1 (0.0%)
1324																			2 (0.0%)																2 (0.0%)
1329																			1 (0.0%)																1 (0.0%)
1331																			1 (0.0%)																1 (0.0%)
1333																			1 (0.0%)																1 (0.0%)
1334																												1 (0.0%)							1 (0.0%)
1338																			2 (0.0%)																2 (0.0%)
1339																			1 (0.0%)																1 (0.0%)
1341																			1 (0.0%)																1 (0.0%)
1342																			1 (0.0%)																1 (0.0%)
1343																			1 (0.0%)																1 (0.0%)
1346																			1 (0.0%)																1 (0.0%)
1348																			1 (0.0%)																1 (0.0%)
1349																			1 (0.0%)																1 (0.0%)
1350																			1 (0.0%)																1 (0.0%)
1351																			1 (0.0%)																1 (0.0%)
1352																			1 (0.0%)																1 (0.0%)
1353																			1 (0.0%)																1 (0.0%)
1354																			1 (0.0%)																1 (0.0%)
1356																			1 (0.0%)																1 (0.0%)
1362																			1 (0.0%)																1 (0.0%)
1363																			1 (0.0%)																1 (0.0%)
1365																			1 (0.0%)																1 (0.0%)
1366																			1 (0.0%)																1 (0.0%)
1367																			1 (0.0%)																1 (0.0%)
1368																			1 (0.0%)																1 (0.0%)
1369																			3 (0.0%)																3 (0.0%)
1370																			1 (0.0%)																1 (0.0%)
1371																			1 (0.0%)																1 (0.0%)
1378																			1 (0.0%)																1 (0.0%)
1379																			1 (0.0%)																1 (0.0%)
1381																			2 (0.0%)																2 (0.0%)
1383																			1 (0.0%)																1 (0.0%)
1384																			1 (0.0%)																1 (0.0%)
1387																			1 (0.0%)																1 (0.0%)
1401																			1 (0.0%)																1 (0.0%)
1402																			2 (0.0%)																2 (0.0%)
1403																			1 (0.0%)																1 (0.0%)
1407																			1 (0.0%)																1 (0.0%)
1408																			1 (0.0%)																1 (0.0%)
1409																			1 (0.0%)																1 (0.0%)
1423																			1 (0.0%)																1 (0.0%)
1443																			1 (0.0%)																1 (0.0%)
1444																			1 (0.0%)																1 (0.0%)
1445																												1 (0.0%)							1 (0.0%)
1489																								1 (0.0%)											1 (0.0%)
1490																								1 (0.0%)											1 (0.0%)
1491																								2 (0.0%)											2 (0.0%)
1492																								1 (0.0%)											1 (0.0%)
1493																								1 (0.0%)											1 (0.0%)
1494							6 (0.0%)																												6 (0.0%)
1495							27 (0.1%)																												27 (0.1%)
1496																													8 (0.0%)						8 (0.0%)
1497																								4 (0.0%)											4 (0.0%)
1498																								8 (0.0%)											8 (0.0%)
1499																								1 (0.0%)											1 (0.0%)
1500																								1 (0.0%)											1 (0.0%)
1501																				1 (0.0%)															1 (0.0%)
1502							1 (0.0%)																												1 (0.0%)
1503																								1 (0.0%)											1 (0.0%)
1504																								1 (0.0%)											1 (0.0%)
1505																								2 (0.0%)											2 (0.0%)
1506					2 (0.0%)																														2 (0.0%)
1507							1 (0.0%)																												1 (0.0%)
1508								1 (0.0%)																											1 (0.0%)
1509							1 (0.0%)																												1 (0.0%)
1510																								2 (0.0%)											2 (0.0%)
1511																														2 (0.0%)					2 (0.0%)
1512							1 (0.0%)																												1 (0.0%)
1513																								1 (0.0%)											1 (0.0%)
1538																												2 (0.0%)							2 (0.0%)
1730																								1 (0.0%)											1 (0.0%)
1787																			1 (0.0%)																1 (0.0%)
1793																			1 (0.0%)																1 (0.0%)
1800																			2 (0.0%)																2 (0.0%)
1801																			3 (0.0%)																3 (0.0%)
1804																			3 (0.0%)																3 (0.0%)
1806																			1 (0.0%)																1 (0.0%)
1828																			1 (0.0%)																1 (0.0%)
2428																					1 (0.0%)														1 (0.0%)
2463																			1 (0.0%)																1 (0.0%)
2464																			2 (0.0%)																2 (0.0%)
2466																			1 (0.0%)																1 (0.0%)
2468																			1 (0.0%)																1 (0.0%)
2469																			1 (0.0%)																1 (0.0%)
2474																			2 (0.0%)																2 (0.0%)
2479																			1 (0.0%)																1 (0.0%)
2489																			1 (0.0%)																1 (0.0%)
2491																			1 (0.0%)																1 (0.0%)
2492																			1 (0.0%)																1 (0.0%)
2494																			1 (0.0%)																1 (0.0%)
2496																			1 (0.0%)																1 (0.0%)
2497																			1 (0.0%)																1 (0.0%)
2498																			3 (0.0%)																3 (0.0%)
2530																			1 (0.0%)																1 (0.0%)
2531																			1 (0.0%)																1 (0.0%)
2532																			1 (0.0%)																1 (0.0%)
2543																			1 (0.0%)																1 (0.0%)
2562																			1 (0.0%)																1 (0.0%)
2578																			1 (0.0%)																1 (0.0%)
2616																			1 (0.0%)																1 (0.0%)
2620																												1 (0.0%)							1 (0.0%)
