# Supplementary material for: pilE G-Quadruplex Is Recognized and Preferentially Bound but Not Processed by the MutL Endonuclease from Neisseria gonorrhoeae Mismatch Repair Pathway
Source: Int J Mol Sci. 2023 Mar 24;24(7):6167. doi: 10.3390/ijms24076167 (PMC10094033; doi:10.3390/ijms24076167)
Supplement: Supplementary file 1 [file ijms-24-06167-s001.zip › Table S3.xlsx]

## Sheet: output
id	NEIS2138
31509	0
31657	0
34752	0
34760	0
53813	0
53814	0
61342	0
61835	0
77403	0
87606	0
88367	0
88373	0
107516	0
108562	0
119903	0
27262	1
27265	1
27274	1
27308	1
27310	1
27316	1
27318	1
27383	1
27421	1
31433	1
31484	1
31505	1
31518	1
31604	1
31615	1
31908	1
32024	1
32027	1
34759	1
34792	1
34798	1
36245	1
36263	1
36287	1
36293	1
36294	1
36296	1
36298	1
37026	1
37033	1
37039	1
37157	1
37173	1
37249	1
37301	1
37346	1
37413	1
37420	1
37450	1
37514	1
37534	1
37535	1
37536	1
37539	1
39109	1
39122	1
41346	1
41348	1
41365	1
41368	1
41369	1
41371	1
41381	1
41383	1
41384	1
41388	1
41401	1
41403	1
41406	1
42834	1
42835	1
46279	1
46283	1
46869	1
47349	1
47469	1
47500	1
47582	1
47608	1
47641	1
47682	1
47718	1
47725	1
47768	1
47788	1
47814	1
47954	1
48067	1
48072	1
48155	1
48316	1
48522	1
48567	1
48576	1
48581	1
48610	1
48613	1
48622	1
48708	1
48737	1
48745	1
48853	1
48972	1
48982	1
49016	1
49049	1
49084	1
49112	1
49144	1
49163	1
49168	1
51667	1
51669	1
51670	1
51718	1
51720	1
51741	1
51781	1
53623	1
53628	1
56255	1
56286	1
56287	1
56778	1
56779	1
57141	1
58866	1
60481	1
60510	1
60512	1
61626	1
61627	1
61735	1
61766	1
75577	1
75953	1
75956	1
75976	1
75981	1
75982	1
76087	1
76089	1
76128	1
76139	1
76236	1
76264	1
76275	1
76284	1
76295	1
76303	1
76305	1
76316	1
76376	1
76390	1
76398	1
76421	1
76443	1
76463	1
76466	1
76476	1
76523	1
77388	1
77392	1
77393	1
77401	1
78377	1
78404	1
78432	1
78434	1
78451	1
78607	1
78682	1
78751	1
78762	1
78815	1
78868	1
78906	1
78968	1
79062	1
79162	1
79228	1
81980	1
82373	1
82374	1
82375	1
82376	1
82377	1
82378	1
82406	1
86366	1
86404	1
86431	1
86527	1
86532	1
86673	1
86830	1
87182	1
87204	1
87306	1
87317	1
87327	1
87375	1
87378	1
87410	1
87435	1
87472	1
87572	1
87723	1
87820	1
87862	1
87915	1
87967	1
88074	1
88105	1
88222	1
88244	1
88256	1
88301	1
88358	1
88359	1
88866	1
95002	1
99923	1
99953	1
106559	1
106581	1
106658	1
106678	1
106798	1
106852	1
106926	1
106980	1
107040	1
107084	1
107088	1
107100	1
107115	1
107117	1
107133	1
107162	1
107326	1
107434	1
107455	1
107476	1
107503	1
107507	1
107597	1
107607	1
107629	1
107694	1
107768	1
107782	1
107797	1
107823	1
107849	1
107850	1
107885	1
107887	1
107946	1
107982	1
107986	1
108007	1
108288	1
108334	1
108340	1
108342	1
108346	1
108352	1
108354	1
108360	1
108426	1
108438	1
108453	1
108508	1
108542	1
108548	1
108572	1
108575	1
108594	1
108609	1
108626	1
108657	1
108658	1
108667	1
108668	1
108687	1
108715	1
108716	1
108722	1
108772	1
108778	1
108783	1
108797	1
108798	1
108801	1
108840	1
108869	1
108889	1
108900	1
108930	1
108973	1
108975	1
108990	1
109003	1
109045	1
109050	1
109060	1
109089	1
109090	1
109101	1
109103	1
109116	1
109245	1
109284	1
109285	1
109287	1
109288	1
109372	1
109373	1
109374	1
109375	1
109524	1
109525	1
109555	1
109575	1
109588	1
109589	1
109628	1
109629	1
109630	1
109631	1
109656	1
109661	1
109663	1
109695	1
109699	1
109706	1
109730	1
109740	1
109767	1
109770	1
109773	1
109796	1
109827	1
109832	1
109837	1
109854	1
109855	1
109869	1
109938	1
109940	1
111415	1
111436	1
111504	1
111508	1
111549	1
111563	1
111608	1
111615	1
111657	1
111670	1
115894	1
115904	1
115973	1
116141	1
116264	1
116278	1
116288	1
116309	1
116332	1
116358	1
116371	1
116374	1
116377	1
116399	1
116401	1
116403	1
116419	1
116423	1
116448	1
116449	1
116462	1
116485	1
116535	1
116546	1
116562	1
116849	1
116859	1
116861	1
116864	1
116893	1
117856	1
117981	1
117984	1
117991	1
118034	1
118055	1
118061	1
118068	1
118089	1
118095	1
118097	1
118110	1
118128	1
118174	1
118176	1
118345	1
118506	1
118543	1
118577	1
118598	1
118604	1
118613	1
118659	1
118660	1
118700	1
118713	1
118726	1
119081	1
119099	1
119100	1
119162	1
119209	1
119308	1
119438	1
119563	1
119685	1
119708	1
119740	1
119743	1
119823	1
119824	1
119837	1
119875	1
119918	1
119932	1
119933	1
