# Supplementary material for: pilE G-Quadruplex Is Recognized and Preferentially Bound but Not Processed by the MutL Endonuclease from Neisseria gonorrhoeae Mismatch Repair Pathway
Source: Int J Mol Sci. 2023 Mar 24;24(7):6167. doi: 10.3390/ijms24076167 (PMC10094033; doi:10.3390/ijms24076167)
Supplement: Supplementary file 1 [file ijms-24-06167-s001.zip › Table S4.xlsx]

## Sheet: Лист1
Assigned	Not assigned	Lack gene
21065	27262	31509
21071	27265	31657
21072	27274	34752
27230	27308	34760
27232	27310	53813
27233	27316	53814
27234	27318	61342
27236	27383	61835
27237	27421	77403
27238	31433	87606
27239	31484	88367
27240	31505	88373
27241	31518	107516
27242	31604	108562
27243	31615	119903
27244	31908
27245	32024
27247	32027
27248	34759
27249	34792
27250	34798
27251	36245
27252	36263
27253	36287
27254	36293
27255	36294
27256	36296
27257	36298
27258	37026
27260	37033
27261	37039
27263	37157
27270	37173
27282	37249
27284	37301
27285	37346
27286	37413
27287	37420
27288	37450
27289	37514
27290	37534
27291	37535
27294	37536
27295	37539
27298	39109
27299	39122
27300	41346
27301	41348
27302	41365
27304	41368
27305	41369
27306	41371
27307	41381
27309	41383
27311	41384
27312	41388
27313	41401
27314	41403
27315	41406
27317	42834
27319	42835
27320	46279
27321	46283
27324	46869
27326	47349
27328	47469
27329	47500
27330	47582
27331	47608
27332	47641
27333	47682
27334	47718
27335	47725
27336	47768
27337	47788
27338	47814
27339	47954
27341	48067
27342	48072
27343	48155
27344	48316
27345	48522
27346	48567
27347	48576
27348	48581
27349	48610
27350	48613
27351	48622
27352	48708
27353	48737
27354	48745
27355	48853
27356	48972
27357	48982
27359	49016
27360	49049
27362	49084
27363	49112
27365	49144
27367	49163
27368	49168
27369	51667
27370	51669
27371	51670
27372	51718
27373	51720
27374	51741
27375	51781
27376	53623
27377	53628
27378	56255
27379	56286
27380	56287
27381	56778
27382	56779
27385	57141
27386	58866
27387	60481
27388	60510
27389	60512
27390	61626
27391	61627
27392	61735
27393	61766
27394	75577
27395	75953
27396	75956
27397	75976
27398	75981
27399	75982
27400	76087
27401	76089
27402	76128
27403	76139
27404	76236
27405	76264
27406	76275
27407	76284
27408	76295
27409	76303
27410	76305
27412	76316
27413	76376
27414	76390
27415	76398
27416	76421
27417	76443
27418	76463
27419	76466
27420	76476
27422	76523
27423	77388
27424	77392
27425	77393
27426	77401
27427	78377
27428	78404
27429	78432
27430	78434
27433	78451
27434	78607
27435	78682
27436	78751
27438	78762
27439	78815
27440	78868
27441	78906
27442	78968
27443	79062
27444	79162
27445	79228
27446	81980
27447	82373
27448	82374
27449	82375
27450	82376
27451	82377
27452	82378
27453	82406
27454	86366
27456	86404
27457	86431
27458	86527
27460	86532
27461	86673
27462	86830
27463	87182
27466	87204
27467	87306
27469	87317
27470	87327
27473	87375
27475	87378
31178	87410
31458	87435
31459	87472
31460	87572
31462	87723
31466	87820
31468	87862
31473	87915
31474	87967
31475	88074
31477	88105
31481	88222
31485	88244
31486	88256
31488	88301
31492	88358
31494	88359
31495	88866
31501	95002
31502	99923
31503	99953
31504	106559
31508	106581
31510	106658
31513	106678
31514	106798
31515	106852
31516	106926
31517	106980
31520	107040
31521	107084
31523	107088
31528	107100
31529	107115
31535	107117
31537	107133
31545	107162
31546	107326
31548	107434
31549	107455
31551	107476
31556	107503
31560	107507
31563	107597
31564	107607
31566	107629
31567	107694
31572	107768
31574	107782
31576	107797
31577	107823
31586	107849
31587	107850
31590	107885
31592	107887
31593	107946
31594	107982
31596	107986
31597	108007
31599	108288
31600	108334
31601	108340
31603	108342
31605	108346
31610	108352
31612	108354
31613	108360
31614	108426
31616	108438
31618	108453
31619	108508
31623	108542
31624	108548
31625	108572
31627	108575
31628	108594
31629	108609
31638	108626
31639	108657
31642	108658
31645	108667
31646	108668
31647	108687
31648	108715
31649	108716
31650	108722
31652	108772
31656	108778
31658	108783
31659	108797
31660	108798
31663	108801
31665	108840
31667	108869
31668	108889
31669	108900
31670	108930
31672	108973
31673	108975
31676	108990
31682	109003
31688	109045
31691	109050
31692	109060
31693	109089
31695	109090
31698	109101
31699	109103
31702	109116
31703	109245
31714	109284
31715	109285
31716	109287
31719	109288
31722	109372
31724	109373
31728	109374
31729	109375
31730	109524
31731	109525
31733	109555
31735	109575
31737	109588
31738	109589
31739	109628
31740	109629
31741	109630
31743	109631
31752	109656
31756	109661
31757	109663
31763	109695
31767	109699
31768	109706
31773	109730
31775	109740
31776	109767
31777	109770
31778	109773
31781	109796
31784	109827
31785	109832
31811	109837
31817	109854
31865	109855
31867	109869
31881	109938
31905	109940
31906	111415
31917	111436
31931	111504
31941	111508
31944	111549
31945	111563
31947	111608
31948	111615
31950	111657
31952	111670
31956	115894
31958	115904
31959	115973
31961	116141
31962	116264
31963	116278
31964	116288
31965	116309
31971	116332
31976	116358
31991	116371
32017	116374
32023	116377
32025	116399
32026	116401
32029	116403
32035	116419
32036	116423
32041	116448
32046	116449
32050	116462
32060	116485
32063	116535
32066	116546
32068	116562
32071	116849
32072	116859
32073	116861
32075	116864
32081	116893
34747	117856
34764	117981
34765	117984
34766	117991
34769	118034
34775	118055
34781	118061
34783	118068
34785	118089
34787	118095
34789	118097
34791	118110
34794	118128
34795	118174
34799	118176
34802	118345
34804	118506
36247	118543
36274	118577
36277	118598
36684	118604
37023	118613
37024	118659
37025	118660
37027	118700
37028	118713
37034	118726
37035	119081
37036	119099
37037	119100
37038	119162
37040	119209
37041	119308
37042	119438
37043	119563
37044	119685
37046	119708
37047	119740
37050	119743
37051	119823
37053	119824
37054	119837
37055	119875
37056	119918
37057	119932
37058	119933
37060	95877
37061	61852
37062	61864
37063	87575
37064	87755
37065
37066
37067
37068
37069
37071
37072
37073
37074
37075
37076
37077
37078
37079
37080
37081
37082
37083
37084
37085
37086
37087
37088
37089
37090
37091
37092
37094
37095
37096
37098
37099
37106
37109
37110
37118
37119
37123
37126
37127
37128
37130
37131
37132
37133
37134
37137
37139
37146
37148
37151
37156
37163
37166
37168
37169
37170
37172
37177
37178
37193
37194
37196
37206
37208
37211
37215
37216
37219
37221
37223
37224
37225
37226
37227
37228
37229
37231
37232
37233
37234
37235
37236
37237
37238
37239
37240
37242
37243
37244
37245
37247
37248
37250
37252
37253
37254
37255
37256
37257
37258
37259
37260
37266
37267
37268
37269
37270
37273
37274
37275
37277
37280
37281
37282
37283
37284
37285
37286
37287
37288
37289
37291
37294
37295
37297
37298
37299
37300
37302
37303
37304
37305
37306
37311
37312
37314
37316
37317
37319
37322
37323
37324
37325
37328
37329
37334
37335
37336
37337
37339
37344
37345
37348
37352
37354
37355
37361
37364
37365
37366
37369
37370
37377
37378
37379
37380
37381
37382
37385
37386
37387
37388
37389
37391
37392
37393
37394
37395
37400
37401
37412
37414
37418
37419
37421
37422
37424
37425
37426
37427
37428
37432
37433
37434
37436
37437
37439
37440
37441
37442
37443
37445
37446
37447
37449
37451
37454
37455
37456
37458
37460
37462
37464
37465
37467
37468
37470
37472
37474
37475
37476
37477
37478
37479
37480
37481
37482
37484
37485
37486
37488
37489
37490
37491
37493
37494
37495
37498
37499
37500
37501
37503
37504
37505
37507
37508
37509
37510
37511
37512
37515
37517
37518
37520
37521
37523
37524
37527
37528
37529
37531
37532
37533
37537
37538
37540
37541
37542
37543
37545
37550
37552
37554
37555
37556
37558
37559
37560
37561
37562
37563
37564
37566
37567
37568
37569
37570
37571
37572
37573
37574
37575
37577
37578
37579
37580
37581
37583
37584
37585
37586
37587
37588
37590
38992
39081
39083
39086
39088
39089
39095
39137
39138
39619
41197
41198
41203
41204
41206
41207
41208
41353
41354
41356
41358
41359
41360
41362
41363
41366
41367
41370
41372
41373
41375
41377
41378
41379
41380
41382
41391
41398
41400
41409
41410
42377
42789
42790
42791
42792
42793
42794
42795
42796
42797
42798
42799
42801
42803
42804
42805
42807
42808
42809
42810
42811
42813
42815
42816
42817
42818
42819
42820
42821
42822
42823
42824
42825
42826
42827
42828
42829
42830
42831
42833
42840
45016
45030
45034
45037
45039
45040
45041
45043
45044
45045
45057
45058
45060
45068
45070
45074
46277
46285
46286
46287
46288
46848
46859
46865
46871
46874
46880
46881
46884
46886
46887
46893
46895
46896
46900
46901
46902
46908
46923
46927
46930
46937
46945
46947
46950
46954
46959
46964
47026
47027
47028
47030
47031
47037
47038
47043
47044
47045
47046
47047
47048
47049
47347
47351
47352
47355
47362
47364
47366
47367
47369
47370
47372
47373
47377
47380
47383
47384
47387
47389
47390
47393
47411
47412
47415
47424
47427
47432
47433
47434
47441
47444
47448
47450
47451
47455
47458
47463
47464
47465
47471
47472
47474
47476
47480
47482
47484
47486
47488
47489
47493
47494
47499
47501
47504
47507
47508
47510
47515
47516
47517
47519
47521
47523
47524
47527
47528
47536
47540
47542
47545
47549
47550
47552
47553
47554
47555
47558
47559
47564
47566
47570
47578
47579
47592
47594
47600
47602
47607
47610
47612
47615
47616
47617
47618
47620
47623
47628
47629
47632
47634
47635
47639
47646
47648
47649
47652
47655
47658
47660
47664
47667
47671
47672
47673
47681
47683
47685
47687
47692
47695
47696
47697
47702
47703
47706
47707
47708
47713
47714
47715
47716
47717
47720
47721
47722
47723
47726
47727
47728
47731
47732
47733
47736
47741
47745
47748
47749
47751
47753
47757
47758
47759
47760
47762
47767
47769
47772
47773
47775
47776
47778
47779
47782
47784
47793
47795
47797
47799
47801
47809
47811
47813
47815
47816
47817
47821
47826
47829
47831
47832
47833
47834
47839
47841
47845
47846
47850
47851
47853
47854
47855
47865
47870
47871
47872
47874
47875
47878
47879
47880
47883
47886
47889
47891
47893
47896
47898
47902
47903
47905
47906
47908
47909
47911
47912
47914
47915
47916
47918
47921
47923
47924
47928
47931
47932
47934
47937
47942
47944
47945
47950
47951
47952
47959
47960
47961
47962
47963
47964
47966
47969
47970
47971
47972
47973
47975
47977
47978
47980
47982
47983
47985
47987
47993
47994
47998
47999
48000
48001
48005
48008
48010
48012
48017
48023
48024
48026
48030
48031
48032
48035
48037
48041
48043
48044
48045
48046
48049
48050
48052
48053
48054
48056
48057
48058
48059
48061
48062
48064
48066
48068
48070
48071
48076
48077
48078
48079
48080
48083
48086
48087
48089
48092
48093
48094
48095
48100
48101
48103
48104
48106
48108
48111
48116
48117
48118
48119
48120
48121
48122
48127
48129
48130
48131
48133
48134
48135
48137
48138
48139
48141
48143
48147
48150
48158
48164
48172
48175
48176
48177
48180
48186
48191
48194
48195
48197
48206
48207
48210
48211
48214
48221
48228
48230
48231
48234
48236
48246
48249
48255
48256
48268
48272
48274
48277
48282
48286
48292
48307
48308
48309
48310
48311
48314
48318
48320
48327
48331
48333
48334
48336
48345
48348
48352
48354
48355
48357
48358
48362
48363
48365
48368
48369
48372
48373
48375
48377
48381
48382
48385
48386
48387
48389
48390
48391
48392
48394
48395
48398
48401
48402
48411
48412
48414
48415
48416
48417
48418
48419
48421
48422
48424
48425
48427
48428
48432
48434
48435
48436
48437
48438
48440
48443
48444
48448
48450
48453
48454
48456
48463
48464
48465
48466
48470
48473
48476
48477
48478
48480
48482
48483
48484
48485
48489
48491
48492
48494
48495
48496
48497
48498
48499
48502
48504
48505
48506
48509
48511
48513
48514
48515
48516
48519
48520
48523
48524
48525
48527
48530
48533
48534
48536
48538
48545
48546
48623
48624
48625
48626
48627
48631
48632
48633
48636
48641
48642
48646
48647
48652
48654
48656
48659
48660
48662
48664
48671
48672
48683
48684
48688
48695
48696
48698
48699
48700
48702
48707
48709
48715
48716
48717
48720
48721
48722
48723
48724
48725
48726
48728
48731
48732
48733
48742
48747
48752
48756
48758
48759
48760
48761
48764
48765
48766
48767
48768
48771
48772
48778
48779
48780
48796
48801
48802
48808
48809
48812
48818
48819
48823
48824
48827
48829
48830
48836
48838
48839
48841
48842
48846
48847
48851
48855
48857
48860
48869
48872
48874
48875
48880
48881
48882
48887
48888
48890
48891
48892
48894
48899
48901
48910
48911
48917
48919
48921
48927
48928
48930
48936
48940
48952
48954
48955
48960
48961
48963
48964
48966
48970
48971
48975
48976
48977
48978
48980
48981
48983
48984
48985
48987
48990
48994
48997
48998
49000
49002
49007
49010
49011
49012
49013
49018
49019
49020
49021
49022
49025
49028
49029
49030
49032
49035
49036
49037
49039
49040
49041
49043
49045
49046
49048
49050
49051
49052
49054
49055
49056
49058
49059
49064
49065
49066
49068
49069
49070
49072
49073
49074
49075
49079
49081
49082
49083
49085
49089
49092
49093
49099
49101
49103
49105
49108
49111
49116
49117
49121
49129
49131
49132
49136
49137
49139
49140
49141
49142
49143
49145
49146
49147
49150
49152
49155
49157
49161
49162
49166
49169
49172
49173
49174
49183
49187
49191
49195
49198
49201
49203
49205
49208
49209
49214
49215
49216
49217
50479
50488
50490
50492
50494
50512
50515
51070
51071
51101
51103
51106
51111
51113
51116
51664
51674
51681
51686
51691
51694
51699
51704
51708
51712
51715
51721
51722
51726
51727
51751
51765
51775
51779
51780
51783
51784
51786
51787
51794
51800
51807
51808
51814
51818
51820
51822
51824
51825
51826
51827
51828
51832
51835
52155
52158
52160
53458
53460
53461
53463
53468
53472
53473
53475
53544
53548
53555
53556
53559
53563
53564
53565
53567
53582
53586
53588
53589
53592
53597
53598
53603
53604
53613
53614
53618
53620
53622
53631
53632
53647
53648
53650
53657
53661
53662
53663
53664
53665
53666
53671
53672
53676
53679
53680
53799
54272
54273
54277
54279
54280
54281
54286
54288
54289
54291
54295
54296
54297
54305
54309
54312
54318
54323
54326
54327
54328
54329
54333
54338
54339
54341
54343
54344
54347
54351
54360
54363
54367
54369
54370
54372
54380
54382
54383
54386
54387
56132
56133
56134
56135
56143
56145
56146
56152
56153
56157
56158
56159
56162
56169
56175
56176
56177
56178
56184
56185
56191
56193
56196
56197
56201
56202
56204
56206
56207
56209
56210
56216
56220
56224
56225
56233
56237
56238
56239
56249
56252
56254
56256
56261
56263
56264
56265
56272
56275
56278
56279
56280
56281
56282
56284
56285
56290
56293
56299
56307
56771
56776
56777
56782
56783
57095
57098
57099
57102
57106
57109
57114
57118
57119
57121
57133
57134
57138
57140
57143
57151
57153
57155
57157
57175
57178
57180
58867
60478
60479
60480
60482
60483
60484
60486
60487
60488
60489
60490
60491
60494
60497
60498
60499
60500
60501
60506
60513
60521
60525
60528
61053
61054
61055
61056
61059
61063
61064
61065
61066
61072
61073
61332
61344
61345
61346
61347
61379
61380
61381
61625
61628
61629
61631
61632
61633
61634
61635
61636
61637
61638
61639
61640
61641
61642
61643
61644
61645
61646
61647
61648
61649
61650
61652
61653
61654
61655
61656
61657
61659
61660
61661
61662
61663
61664
61665
61666
61667
61668
61669
61670
61671
61673
61675
61676
61677
61678
61679
61680
61684
61685
61688
61690
61693
61694
61695
61696
61697
61698
61700
61702
61705
61706
61707
61708
61711
61712
61713
61714
61715
61716
61717
61718
61719
61720
61721
61722
61723
61724
61726
61727
61730
61731
61732
61733
61736
61739
61740
61743
61744
61745
61746
61747
61748
61749
61750
61751
61752
61753
61754
61755
61756
61757
61763
61764
61765
61767
61772
61773
61775
61777
61781
61782
61783
61784
61786
61788
61790
61791
[truncated: 13,518 more rows]
