# Supplementary material for: pilE G-Quadruplex Is Recognized and Preferentially Bound but Not Processed by the MutL Endonuclease from Neisseria gonorrhoeae Mismatch Repair Pathway
Source: Int J Mol Sci. 2023 Mar 24;24(7):6167. doi: 10.3390/ijms24076167 (PMC10094033; doi:10.3390/ijms24076167)
Supplement: Supplementary file 1 [file ijms-24-06167-s001.zip › Table S5.xlsx]

## Sheet: Лист1
Assigned	Not assigned		Lack gene
14729	48263	27102	34760	31509	0
21065	48270	27144	37214	31657	0
21067	48288	27155	53612	34752	0
27230	48315	27228	57093	34760	0
27231	48333	27235	76362	53813	0
27232	48337	27266	76472	53814	0
27233	48347	27310	77401	61342	0
27234	48396	27318	77403	61835	0
27236	48405	27465	86236	77403	0
27237	48458	31425		87606	0
27238	48459	31529		88367	0
27239	48518	31575		88373	0
27240	48601	31592		107516	0
27241	50498	31712		108562	0
27242	76283	31953		119903	0
27243	76291	36269
27244	86575	36274
27245	86726	37176
27246	87575	37308
27247		37440
27248		37581
27249		39589
27250		40839
27251		41200
27252		41203
27253		41316
27254		41346
27255		41349
27256		41352
27257		41353
27258		41363
27259		41371
27260		41380
27261		41386
27262		41388
27263		41396
27264		41403
27265		42796
27271		42800
27273		46278
27283		46288
27285		47045
27290		47349
27293		47352
27294		47353
27297		47355
27303		47356
27304		47360
27305		47361
27307		47363
27311		47365
27321		47367
27322		47369
27325		47373
27327		47376
27332		47379
27338		47387
27339		47388
27340		47391
27343		47393
27344		47394
27348		47396
27351		47398
27354		47399
27361		47400
27366		47402
27371		47405
27376		47406
27377		47407
27378		47408
27383		47410
27384		47413
27396		47414
27402		47419
27403		47424
27407		47433
27408		47434
27409		47438
27411		47445
27412		47446
27415		47447
27419		47456
27431		47457
27432		47458
27436		47459
27437		47463
27450		47467
27455		47469
27459		47470
27464		47473
27466		47474
27467		47477
27468		47478
31128		47479
31129		47487
31333		47488
31334		47490
31335		47491
31336		47495
31337		47504
31338		47508
31339		47512
31340		47514
31341		47516
31342		47517
31343		47520
31344		47522
31345		47530
31346		47531
31347		47532
31348		47534
31349		47537
31350		47538
31351		47551
31352		47562
31353		47565
31354		47566
31355		47580
31356		47581
31357		47583
31359		47593
31360		47595
31361		47603
31362		47622
31363		47632
31364		47635
31365		47637
31366		47653
31367		47655
31368		47659
31369		47675
31370		47687
31371		47705
31372		47710
31373		47712
31374		47713
31375		47717
31376		47723
31377		47724
31378		47726
31379		47740
31380		47754
31381		47758
31382		47808
31383		47820
31384		47842
31385		47853
31386		47855
31387		47863
31388		47870
31389		47873
31390		47874
31391		47882
31392		47888
31393		47898
31394		47909
31395		47912
31396		47915
31397		47917
31398		47919
31399		47922
31400		47930
31401		47945
31402		47948
31403		47953
31404		47962
31405		47965
31406		47966
31407		47971
31408		47973
31409		47975
31410		47977
31411		47981
31412		48000
31413		48004
31414		48015
31415		48020
31416		48027
31417		48028
31418		48034
31419		48037
31420		48050
31421		48051
31422		48055
31423		48058
31424		48061
31426		48072
31427		48073
31428		48074
31429		48075
31430		48077
31431		48082
31432		48083
31433		48084
31434		48090
31435		48096
31436		48100
31437		48101
31438		48102
31439		48103
31440		48104
31441		48106
31442		48125
31443		48127
31444		48131
31445		48132
31446		48140
31447		48144
31448		48148
31449		48150
31450		48153
31451		48157
31452		48163
31453		48165
31454		48166
31455		48168
31456		48170
31460		48171
31463		48175
31468		48179
31469		48180
31470		48182
31472		48184
31477		48185
31478		48186
31480		48188
31481		48192
31483		48194
31491		48195
31492		48196
31496		48200
31506		48202
31510		48203
31511		48204
31512		48205
31517		48208
31520		48209
31521		48210
31523		48211
31524		48212
31535		48216
31537		48220
31547		48222
31548		48223
31549		48224
31550		48225
31551		48227
31552		48231
31556		48232
31557		48234
31559		48235
31563		48240
31564		48242
31566		48247
31567		48248
31576		48251
31577		48252
31578		48253
31579		48255
31582		48261
31584		48262
31586		48264
31588		48265
31591		48267
31593		48269
31594		48276
31602		48277
31610		48282
31611		48283
31615		48284
31616		48285
31620		48289
31621		48291
31625		48295
31626		48300
31629		48301
31631		48302
31637		48303
31638		48305
31639		48312
31643		48313
31644		48319
31646		48321
31650		48331
31654		48332
31655		48336
31661		48339
31662		48342
31667		48344
31668		48346
31669		48350
31670		48353
31671		48355
31672		48356
31674		48359
31675		48361
31679		48363
31685		48364
31686		48365
31691		48370
31692		48372
31695		48374
31698		48376
31699		48377
31703		48384
31708		48388
31713		48393
31717		48394
31722		48398
31723		48400
31724		48403
31726		48408
31727		48409
31728		48412
31729		48413
31730		48415
31732		48418
31736		48422
31737		48423
31738		48424
31739		48426
31740		48428
31741		48430
31743		48433
31748		48435
31749		48440
31750		48441
31756		48442
31759		48444
31762		48445
31767		48446
31768		48448
31770		48449
31771		48451
31777		48453
31791		48457
31808		48468
31811		48475
31812		48479
31908		48481
31949		48486
31950		48487
31952		48488
31954		48494
31955		48500
31956		48504
31957		48509
31958		48510
31959		48511
31962		48512
31963		48515
31968		48516
31969		48517
31971		48522
31972		48525
31976		48526
31982		48528
31999		48529
32001		48536
32003		48543
32007		48547
32016		48548
32018		48549
32020		48550
32022		48551
32023		48552
32025		48553
32026		48554
32030		48555
32032		48556
32033		48557
32034		48558
32037		48560
32038		48562
32047		48563
32052		48564
32053		48565
32070		48566
34747		48568
34750		48569
34753		48570
34755		48572
34756		48573
34757		48574
34761		48575
34763		48576
34764		48578
34777		48579
34778		48580
34782		48581
34786		48582
34787		48583
34789		48584
34791		48585
34796		48586
34798		48587
34799		48589
36238		48590
36251		48591
36257		48592
36268		48593
36270		48595
36291		48596
37022		48597
37030		48598
37031		48599
37032		48600
37033		48604
37045		48605
37094		48606
37096		48607
37097		48608
37098		48609
37099		48610
37100		48612
37101		48613
37103		48614
37104		48615
37109		48617
37110		48618
37113		48624
37115		48625
37116		48629
37117		48634
37120		48637
37121		48639
37122		48640
37124		48643
37147		48645
37149		48655
37150		48659
37154		48665
37160		48669
37167		48674
37170		48678
37179		48683
37181		48687
37182		48691
37183		48696
37184		48715
37185		48719
37193		48723
37194		48725
37196		48727
37198		48736
37199		48737
37208		48738
37209		48744
37210		48745
37216		48746
37217		48753
37218		48762
37219		48770
37221		48773
37223		48774
37224		48776
37225		48781
37226		48782
37227		48792
37228		48816
37229		48823
37231		48826
37232		48832
37233		48837
37238		48842
37239		48843
37240		48846
37241		48859
37243		48862
37245		48864
37248		48867
37250		48880
37252		48886
37254		48887
37255		48890
37256		48894
37257		48904
37258		48907
37259		48909
37262		48912
37263		48916
37264		48918
37265		48919
37271		48921
37274		48926
37275		48927
37278		48938
37279		48949
37281		48956
37282		48960
37284		48965
37286		48968
37287		48972
37288		48980
37289		48982
37290		48992
37291		49017
37295		49047
37296		49048
37297		49049
37298		49057
37299		49066
37301		49070
37302		49080
37303		49084
37304		49091
37305		49132
37306		49139
37309		49168
37310		49177
37312		49178
37315		49180
37316		49185
37318		49189
37320		49192
37321		49200
37326		49213
37327		50480
37330		50494
37331		50514
37332		51545
37333		51669
37338		51764
37342		53590
37343		53592
37346		53603
37347		53604
37350		53605
37351		53606
37358		53610
37360		54275
37362		54328
37363		54330
37367		54386
37368		56141
37374		56178
37375		56196
37376		56229
37383		56242
37384		56245
37392		56247
37397		56250
37398		56252
37399		56261
37403		56262
37404		56265
37406		56266
37408		56269
37410		56270
37413		56271
37415		56273
37417		56274
37420		56275
37422		56770
37423		60505
37442		61345
37448		61381
37452		61651
37453		61835
37457		61865
37459		61872
37460		63397
37461		63399
37462		63415
37463		63417
37464		74373
37465		74453
37469		74529
37471		75961
37472		75982
37473		76156
37476		76164
37478		76272
37481		76295
37482		76300
37483		76303
37486		76315
37487		76316
37490		76318
37491		76334
37493		76345
37494		76347
37496		76349
37499		76358
37501		76359
37503		76376
37504		76389
37505		76399
37506		76401
37507		76405
37509		76408
37510		76409
37511		76413
37512		76414
37513		76415
37514		76417
37516		76419
37517		76421
37518		76423
37520		76424
37521		76425
37522		76432
37523		76437
37524		76440
37525		76443
37527		76449
37528		76459
37529		76466
37531		76467
37532		76475
37533		76476
37534		76482
37535		76483
37536		76485
37537		76488
37538		76512
37539		76520
37540		76524
37543		77388
37544		77394
37545		77397
37546		77400
37548		77402
37551		77408
37552		78442
37566		78455
37567		78462
37582		78487
39097		78496
39104		78543
39105		78545
39118		78553
39119		78600
39124		78626
39125		78677
39127		78829
39133		78848
39619		78913
40497		78935
41197		79028
41198		79061
41199		79079
41202		79240
41205		79343
41208		79360
41209		82000
41210		82013
41354		82589
41356		83823
41357		86613
41362		86614
41367		86619
41370		86623
41373		87089
41374		87102
41381		87169
41382		87204
41383		87336
41390		87367
41391		87391
41392		87410
41393		87432
41395		87500
41398		87602
41399		87762
41402		87772
41404		87787
41405		87793
41406		87851
41410		87956
42377		88033
42789		88036
42790		88070
42791		88096
42792		88109
42793		88234
42794		88235
42797		88236
42798		88237
42802		88239
42803		88241
42804		88247
42805		88260
42806		88283
42807		88285
42808		88297
42809		88298
42811		88299
42813		88301
42815		89174
42816		99916
42817		99917
42819		99930
42820		99931
42821		99947
42822		99948
42823		100077
42824		100081
42825		100082
42826		106675
42827		106677
42828		106734
42829		106746
42830		106751
42831		106900
42832		107146
42833		107174
42834		107234
42835		107238
42836		107267
42837		107330
42838		107347
42839		107501
42840		107689
42841		107709
42842		107734
42843		107860
45011		107866
45012		107899
45015		107939
45019		108288
45020		108291
45021		108308
45029		108309
45031		108331
45032		108339
45033		108345
45034		108347
45036		108353
45038		108355
45039		108356
45042		108401
45043		108426
45046		108435
45047		108439
45049		108474
45051		108520
45055		108522
45059		108540
45061		108551
45062		108570
45063		108571
45064		108572
45065		108609
45066		108610
45067		108611
45073		108612
45330		108615
46272		108617
46275		108618
46277		108619
46279		108625
46282		108627
46283		108628
46848		108629
46849		108630
46857		108631
46865		108632
46870		108634
46871		108636
46872		108641
46874		108643
46875		108644
46876		108646
46878		108647
46879		108648
46886		108649
46887		108651
46890		108653
46891		108658
46893		108662
46894		108663
46896		108664
46897		108665
46901		108666
46906		108674
46908		108687
46910		108691
46922		108706
46923		108711
46924		108717
46925		108721
46928		108734
46929		108736
46930		108741
46932		108757
46944		108766
46947		108767
46952		108769
46958		108776
46959		108777
46964		108778
47026		108783
47027		108787
47029		108791
47032		108825
47033		108841
47034		108847
47037		108867
47038		108873
47040		108876
47041		108888
47042		108889
47044		108890
47046		108891
47047		108892
47347		108909
47351		108911
47354		108918
47358		108919
47362		108930
47364		108933
47368		108938
47370		108939
47372		108941
47374		108945
47377		108957
47378		108961
47380		108970
47381		108973
47384		108982
47389		109012
47390		109015
47395		109050
47397		109084
47403		109102
47404		109103
47409		109105
47411		109106
47415		109109
47422		109110
47427		109111
47431		109114
47432		109115
47436		109119
47440		109121
47441		109141
47444		109156
47448		109212
47450		109216
47451		109340
47452		109396
47455		109397
47461		109399
47464		109412
47465		109416
47468		109538
47471		109564
47476		109565
47480		109577
47482		109581
47484		109660
47485		109662
47492		109673
47493		109675
47494		109725
47499		109737
47501		109821
47503		109857
47507		109860
47521		109867
47523		109871
47524		109873
47526		109874
47528		109934
47529		109954
47535		109956
47536		109963
47539		109965
47541		109980
47542		111443
47546		111445
47548		111447
47549		111532
47550		111554
47553		111598
47555		111643
47559		111741
47560		115921
47563		115922
47564		115929
47567		115993
47569		115994
47570		116072
47572		116180
47573		116306
47575		116316
47576		116335
47577		116389
47582		116392
47584		116395
47586		116418
47589		116419
47590		116446
47592		116478
47594		116495
47598		116501
47599		116508
47600		116519
47601		116526
47608		116538
47609		116544
47610		116551
47611		116552
47612		116557
47613		116576
47614		116587
47615		116588
47616		116590
47617		116592
47618		116867
47620		116868
47621		116869
47623		116874
47626		116876
47628		116878
47629		116879
47630		116885
47631		116890
47636		116904
47638		117798
47642		117852
47643		117904
47644		117912
47645		117914
47647		117921
47648		117981
47649		118013
47650		118134
47651		118184
47652		118219
47656		118466
47657		118562
47662		118584
47663		118783
47664		119217
47666		119238
47669		119339
47672		119348
47673		119372
47674		119412
47678		119439
47680		119626
47681		119641
47683		119646
47684		119652
47685		119657
47686		119669
47689		119677
47690		119680
47691		119692
47693		119696
47694		119701
47695		119703
47697		119706
47699		119707
47700		119713
47701		119718
47707		119724
47708		119725
47709		119728
47711		119730
47715		119740
47716		119743
47718		119751
47719		119766
47720		119768
47722		119773
47728		119775
47729		119779
47730		119787
47731		119791
47733		119803
47735		119810
47736		119811
47739		119813
47741		119814
47745		119818
47746		119819
47747		119830
47748		119831
47750		119832
47751		119852
47752		119861
47753		119875
47759		119876
47760		119879
47763		119899
47764		119900
47765		119902
47768		119903
47770		119904
47773		119909
47778		119915
47779		119925
47780		119931
47781		119935
47783
47784
47786
47788
47790
47791
47793
47794
47795
47798
47802
47803
47804
47805
47807
47809
47810
47811
47813
47814
47816
47817
47818
47819
47822
47825
47826
47827
47833
47834
47835
47836
47839
47843
47844
47845
47846
47847
47848
47850
47851
47852
47854
47857
47858
47859
47861
47862
47864
47865
47867
47868
47869
47871
47872
47876
47877
47878
47879
47880
47881
47884
47885
47887
47891
47892
47893
47894
47895
47897
47905
47907
47910
47911
47913
47914
47916
47918
47920
47921
47923
47924
47925
47927
47929
47931
47932
47933
47934
47935
47936
47937
47942
47944
47946
47947
47949
47950
47951
47952
47954
47956
47959
47961
47963
47964
47967
47968
47970
47979
47980
47982
47983
47984
47985
47986
47987
47988
47990
47993
47994
47995
47998
47999
48001
48002
48003
48005
48006
48008
48010
48014
48016
48018
48019
48021
48022
48023
48024
48030
48031
48032
48033
48035
48036
48039
48040
48041
48044
48045
48052
48053
48054
48056
48057
48063
48065
48066
48067
48069
48070
48071
48078
48080
48081
48085
48086
48089
48091
48092
48093
48094
48095
48105
48107
48108
48109
48112
48117
48119
48120
48121
48122
48124
48126
48129
48130
48133
48134
48135
48137
48138
48139
48141
48142
48151
48152
48154
48158
48172
48176
48177
48178
48183
48187
48189
48190
48197
48198
48206
48207
48214
48217
48226
48228
48230
48236
48237
48238
48239
48241
48244
48246
48256
48257
48259
48266
48272
48274
48279
48280
48281
48290
48292
48294
48297
48299
48306
48307
48308
48310
48311
48314
48317
48318
48323
48325
48327
48334
48338
48345
48357
48360
48362
48369
48371
48373
48378
48379
48380
48381
48382
48383
48389
48395
48397
48401
48402
48407
48410
48416
48417
48425
48427
48431
48432
48436
48450
48452
48455
48462
48463
48470
48471
48477
48478
48483
48484
48485
48489
48490
48499
48501
48503
48506
48513
48519
48520
48523
48531
48532
48533
48534
48537
48538
48539
48541
48544
48545
48546
48619
48620
48621
48623
48628
48635
48648
48649
48652
48653
48654
48656
48660
48663
48664
48666
48667
48675
48682
48684
48685
48689
48692
48693
48694
48697
48699
48701
48702
48703
48704
48705
48708
48709
48710
48711
48712
48713
48714
48718
48720
48722
48724
48729
48730
48731
48734
48735
48755
48757
48758
48759
48760
48763
48767
48772
48777
48778
48780
48785
48788
48790
48798
48801
48802
48803
48806
48808
48809
48810
48812
48813
48815
48818
48820
48825
48827
48829
48830
48831
48834
48835
48836
48841
48847
48849
48851
48852
48855
48856
48860
48863
48868
48872
48875
48881
48882
48891
48892
48893
48895
48896
48898
48899
48903
48906
48911
48914
48915
48925
48928
48930
48934
48936
48939
48940
48941
48942
48943
48946
48950
48951
48952
48954
48955
48964
48967
48970
48971
48974
48975
48976
48978
48983
48985
48986
48987
48988
48990
48993
48994
48995
48996
48997
48998
48999
49000
49001
49003
49004
49005
49006
49007
49010
49011
49012
49013
49014
49016
49018
49019
49020
49021
49022
49025
49028
49032
49035
49036
49037
49038
49039
49040
49041
49042
49044
49045
49050
49051
49052
49054
49055
49056
49060
49064
49065
49068
49069
49072
49073
49074
49075
49076
49077
49078
49079
49081
49082
49089
49090
49092
49093
49096
49097
49098
49099
49101
49102
49103
49105
49106
49107
49108
49109
49111
49112
49113
49114
49116
49117
49121
49126
49129
49131
49133
49134
49136
49137
49140
49141
49142
49143
49144
49146
49147
49149
49150
49152
49154
49155
49156
49157
49158
49159
49160
49161
49163
49169
49176
49179
49184
49186
49193
49195
49196
49197
49201
49204
49206
49210
49211
49212
49214
49216
49218
50482
50483
50490
50491
50493
50499
50500
50511
51099
51100
51104
51107
51108
51111
51113
51115
51117
51660
51667
51670
51672
51674
51678
51679
51686
51690
51693
51694
51695
51699
51703
51704
51706
51707
51711
51712
51715
51717
51718
51719
51720
51723
51724
51725
51726
51727
51729
51730
51735
51736
51739
51740
51742
51747
51749
51751
51755
51763
51775
51777
51779
51780
51782
51783
51784
51785
51786
51788
51789
51790
51793
51795
51796
51797
51802
51806
51808
51812
51814
51818
51819
51820
51822
51827
51832
51834
51835
51892
51896
51899
51900
52154
52157
52158
52162
52163
52168
52755
52758
52760
52761
52768
53458
53465
53472
53475
53558
53560
53561
53564
53565
53568
53571
53581
53582
53584
53586
53588
53597
53598
53600
53608
53613
53614
53618
53628
53631
53633
53644
53647
53648
53650
53651
53657
53661
53662
53663
53664
53665
53669
53671
53672
53676
53678
53679
53680
53799
54271
54274
54276
54278
54284
54294
54296
54302
54308
54313
54314
54315
54321
54325
54331
54332
54336
54337
54340
54344
54345
54347
54348
54352
54355
54357
54359
54366
54367
54369
54370
54374
54375
54380
54383
54384
56126
56131
56132
56134
56135
56143
56145
56146
56149
56153
56157
56158
56159
56162
56174
56181
56185
56191
56193
56194
56195
56200
56201
56202
56204
56205
56206
56208
56209
56216
56220
56221
56222
56224
56225
56228
56231
56234
56235
56238
56249
56254
56255
56256
56257
56263
56276
56278
56280
56281
56285
56287
56290
56297
56299
56307
56308
56771
56773
56774
56775
56776
56777
56778
56779
56780
56781
56782
56783
56784
56785
56786
56787
56788
56789
57092
57094
57096
57097
57100
57106
57109
57114
57115
57116
57119
57121
57122
57130
57133
57134
57136
57138
57139
57141
57142
57144
57145
57148
57153
57154
57155
57162
57166
57167
57170
57171
57173
57175
57177
57178
57180
59511
60436
60437
60482
60483
60484
60485
60486
60489
60490
60491
60492
60493
60494
60497
60503
60507
60509
60514
60516
60518
60519
60520
60526
60531
61054
61059
61063
61064
61065
61066
61068
61072
61073
61075
61337
61344
61346
61347
61348
61353
61379
61625
61626
61627
61629
61631
61632
61633
61634
61635
61636
61637
61638
61639
61640
61641
61643
61644
61645
61646
61647
61648
61649
61650
61652
61653
61655
61656
61657
61659
61660
61661
61663
61664
61665
61666
61667
61668
61670
61673
61675
61676
61677
61684
61686
61687
61688
61690
61691
61692
61695
61696
61698
61699
61700
61705
61707
61708
61711
61712
61713
61714
61715
61718
61719
61720
61721
61723
61724
61725
61726
61731
61732
61733
61734
61736
61738
61739
61740
61741
61748
61749
61754
61755
61756
61757
61759
61767
61778
61779
61780
[truncated: 12,940 more rows]
